# Supplementary material for: Dynamic coordination transformation of active sites in single-atom MoS2 catalysts for boosted oxygen evolution catalysis
Source: Royal Society of Chemistry journal article supplement (doi:10.1039/d1ee02750f), 2022-01-01
Supplement: d1ee02750f1.pdf [file d1ee02750f1.pdf]

**Supporting Information for**  
**Dynamic Coordination Transformation of Active Site in Single-Atom MoS<sub>2</sub> Catalyst for Boosted Oxygen Evolution Catalysis**

Nian Ran<sup>1,2</sup>, Youwei Wang<sup>1,2</sup>, Erhong Song<sup>1,2</sup>, Yao Zhou<sup>4, \*</sup> and Jianjun Liu<sup>1,2,3, \*</sup>

<sup>1</sup>State Key Laboratory of High Performance Ceramics and Superfine Microstructures, Shanghai Institute of Ceramics, Chinese Academy of Sciences, Shanghai 200050, China

<sup>2</sup>Center of Materials Science and Optoelectronics Engineering, University of Chinese Academy of Sciences, Beijing 100049, China

<sup>3</sup>School of Chemistry and Materials Science, Hangzhou Institute for Advanced Study, University of Chinese Academy of Science, 1 Sub-lane Xiangshan, Hangzhou 310024, China

<sup>4</sup>Advanced Research Institute of Multidisciplinary Science, and School of Chemistry and Chemical Engineering, Beijing Institute of Technology, Beijing 100081, China

\* Corresponding Email: [jliu@mail.sic.ac.cn](mailto:jliu@mail.sic.ac.cn); [zhouyao@bit.edu.cn](mailto:zhouyao@bit.edu.cn)

## Supporting Figures

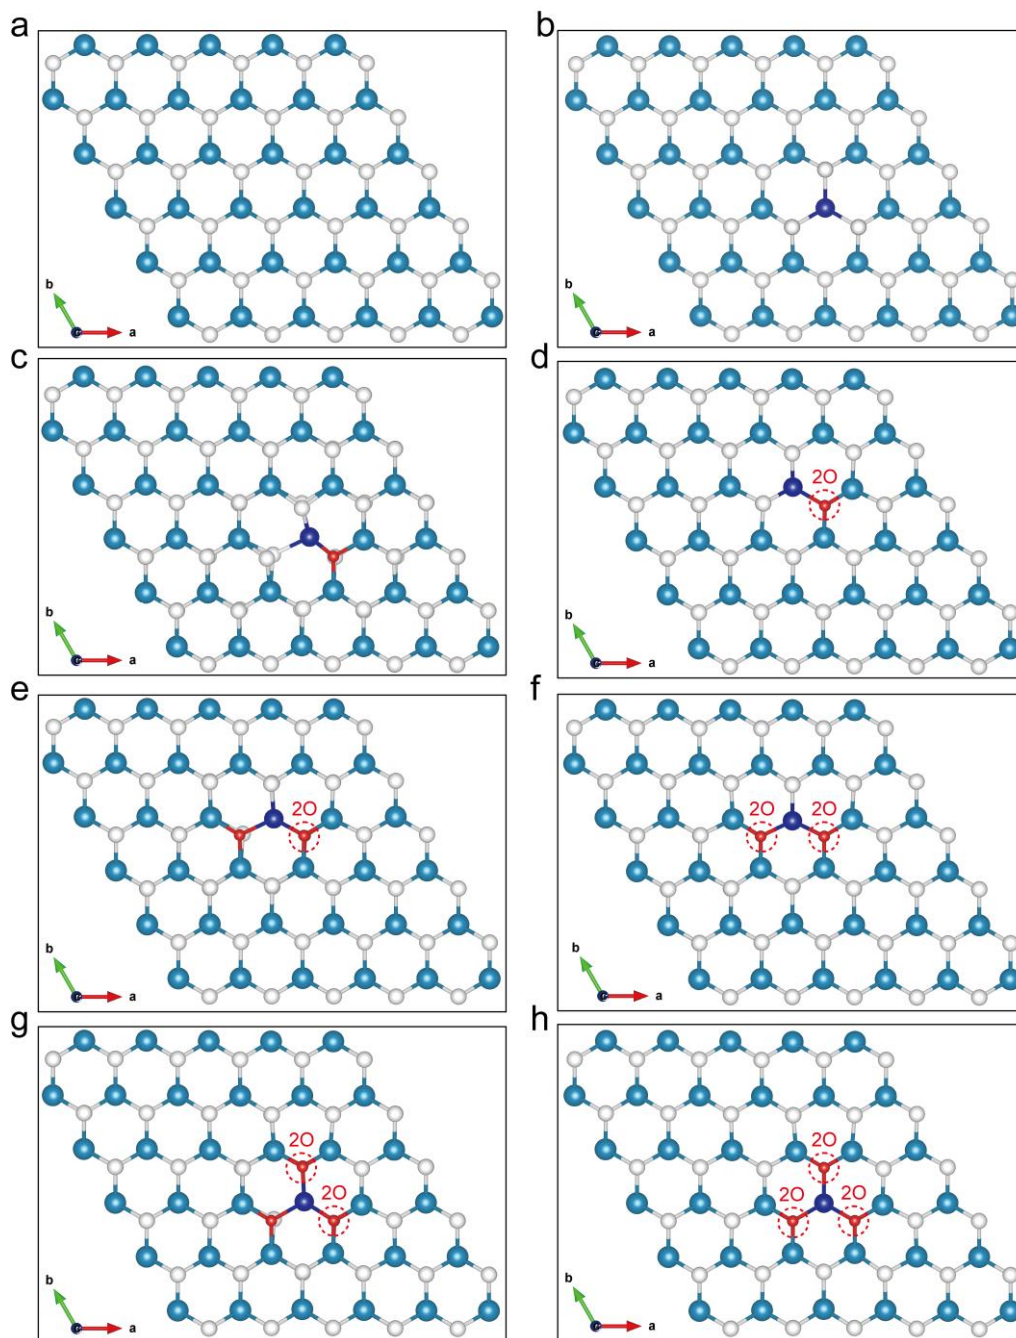

**Figure S1.** Schematic of transition metal (TM) atom or transition metal atom co-doped with different numbers of oxygen (O) atoms in 2H phase MoS<sub>2</sub>. **a**, MoS<sub>2</sub>. **b**, TM doped in MoS<sub>2</sub>. **c-h**, TM co-doped with 1~6 of O in MoS<sub>2</sub>. The white, blue, dark blue, and red colors represent S, Mo, TM, and O atoms, respectively.

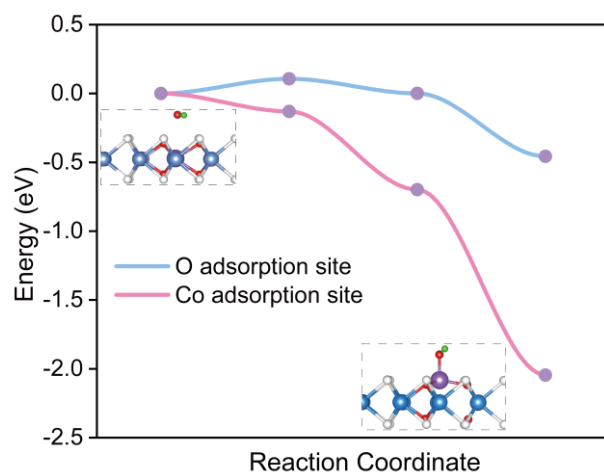

**Figure S2.** Potential active sites on cobalt co-doped six oxygen atoms in 2H phase MoS<sub>2</sub>. The Co site is the active site because it's lower thermodynamic energy and lower potential barrier.

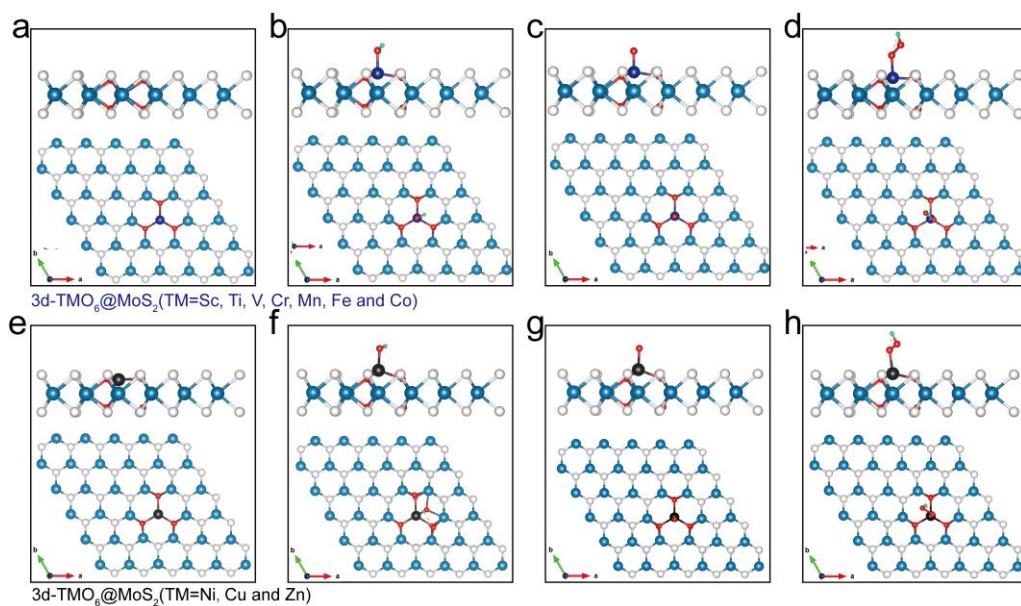

**Figure S3.** Configurations of adsorbates (O, OH, OOH) on transition metal atom (TM) co-doped with six oxygen atoms in 2H phase MoS<sub>2</sub> with diverse coordination. **a-d**, 3d-TMO<sub>6</sub>@MoS<sub>2</sub> (TM=Sc, Ti, V, Cr, Mn, Fe and Co). **e-h**, 3d-TMO<sub>6</sub>@MoS<sub>2</sub> (TM=Ni, Cu and Zn). The white, blue, dark blue, dark, green and red colors represent S, Mo, (Sc, Ti, V, Cr, Mn, Fe and Co), (Ni, Cu and Zn), H and O atoms, respectively.

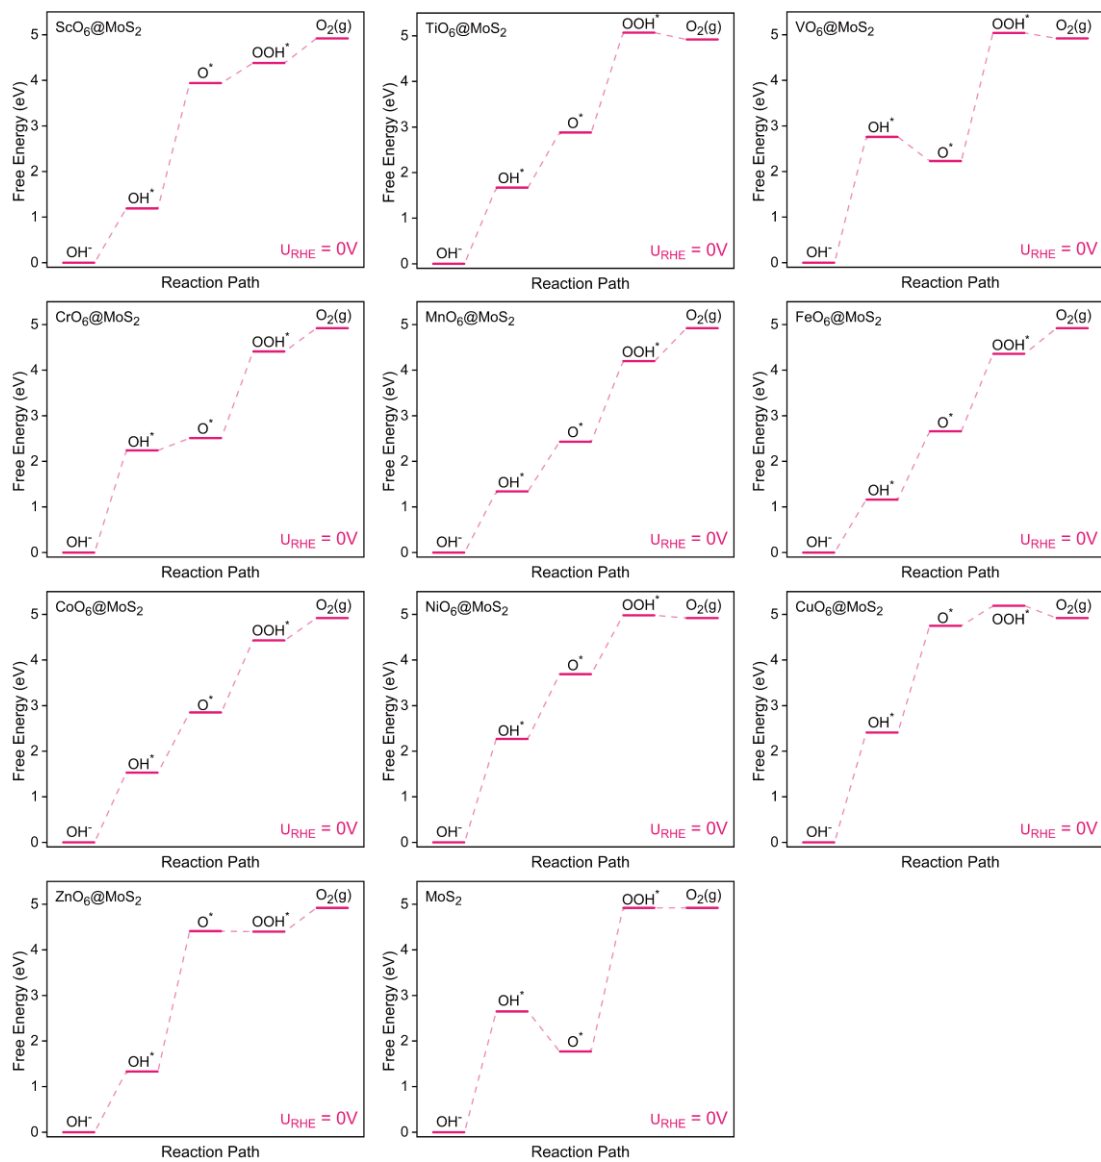

**Figure S4.** Free-energy diagram for OER on transition metal atom (TM) co-doped with six oxygen atoms in 2H phase MoS<sub>2</sub>, at zero electrode potential.

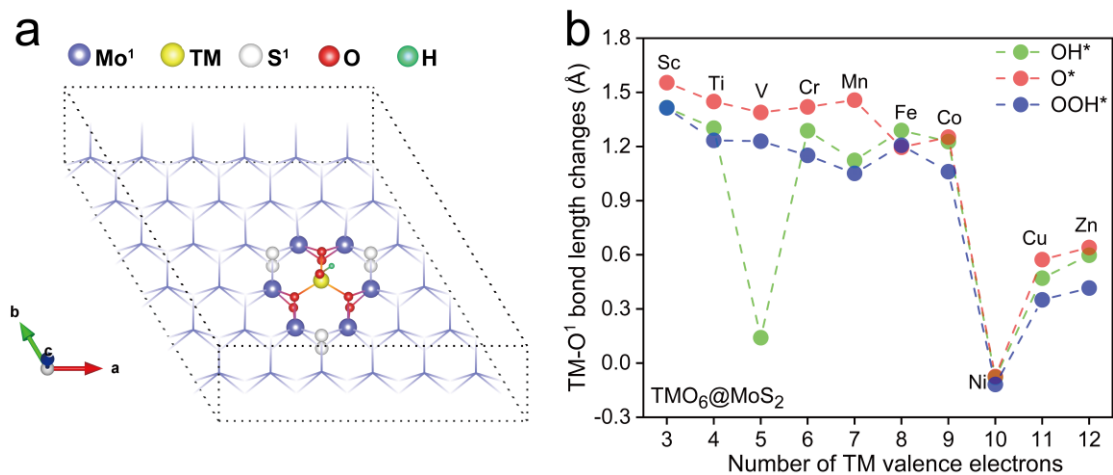

**Figure S5.** TM-O<sup>I</sup> bond length change after adsorbed OH\*, O\* and OOH\* is an efficient method to determine the movement of active sites. **a**, schematic diagram of the 3d-TMO<sub>6</sub>@MoS<sub>2</sub> structure after adsorption of the intermediates (OH\*). **b**, the TM-O<sup>I</sup> bond length change of after adsorbed OH\*, O\* and OOH\*, where O<sup>I</sup> represents the oxygen atom on the opposite side of the adsorbed intermediate.

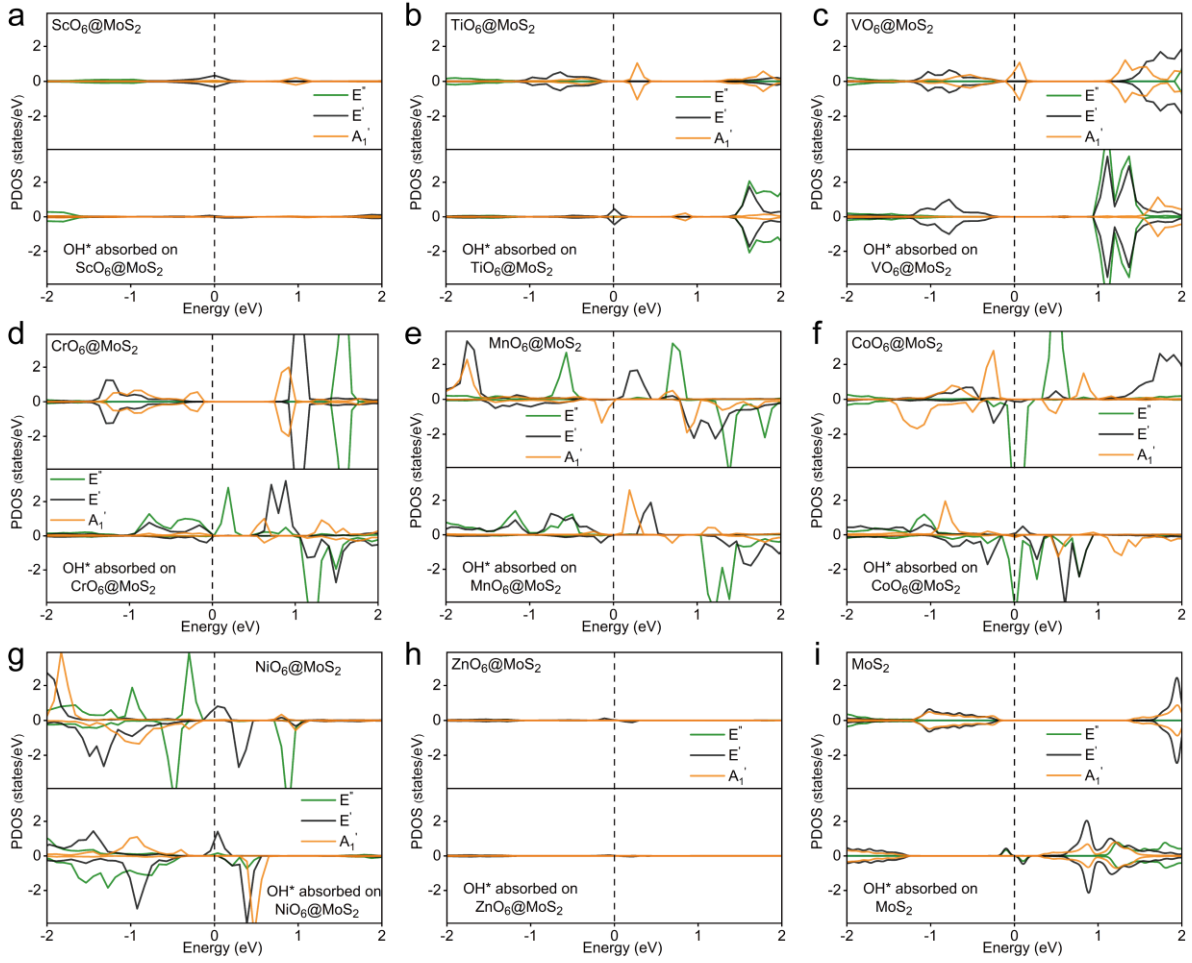

**Figure S6.** The density of projected states (PDOS) of 3d-TMO<sub>6</sub>@MoS<sub>2</sub> and after adsorption OH\* on 3d-TMO<sub>6</sub>@MoS<sub>2</sub>.

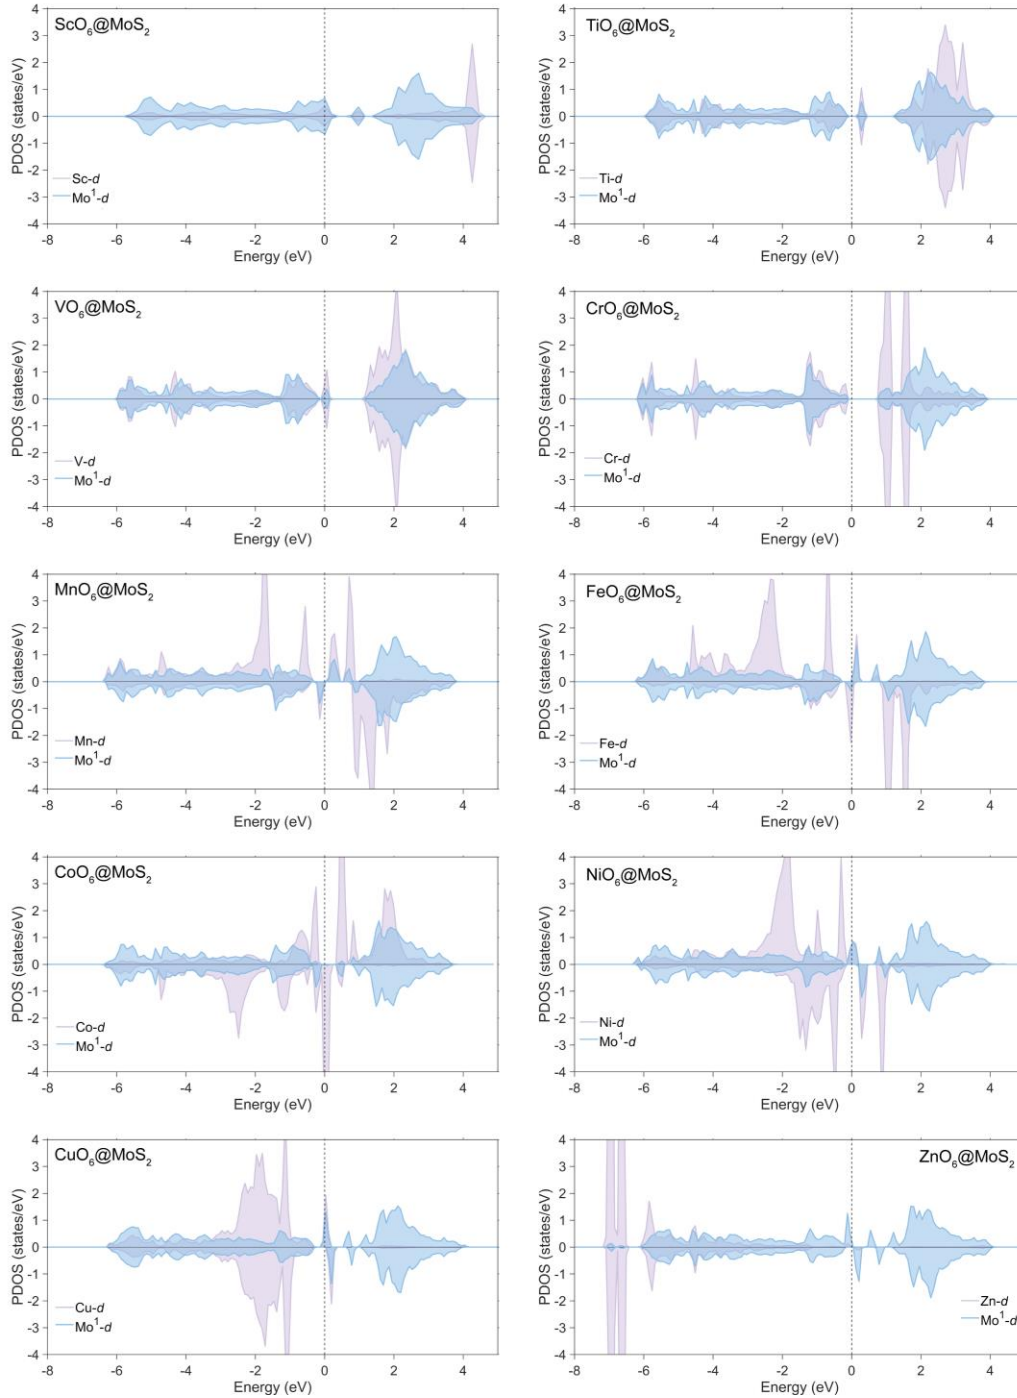

**Figure S7.** The density of projected states (PDOS) of transition metal atom (TM) co-doped with six oxygen atoms in 2H phase MoS<sub>2</sub>, Where Mo<sup>1</sup> represents the nearest neighbor Mo atoms around the doped atoms.



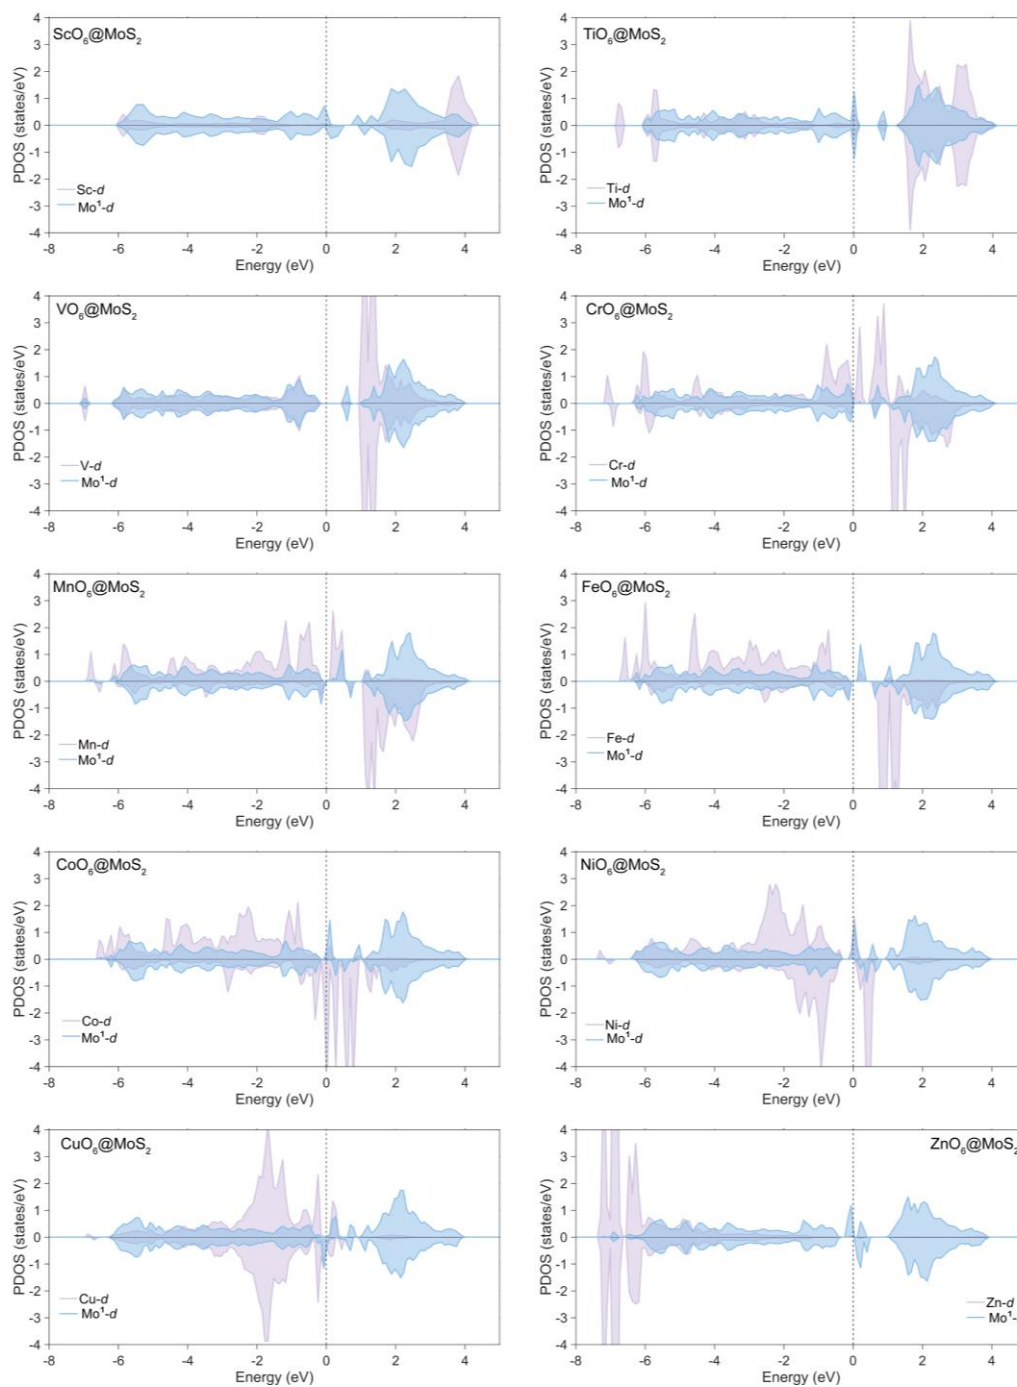

**Figure S8.** The density of projected states (PDOS) of  $\text{OH}^*$  on transition metal atom (TM) co-doped with six oxygen atoms in 2H phase  $\text{MoS}_2$ , Where  $\text{Mo}^1$  represents the nearest neighbor Mo atoms around the doped atoms.

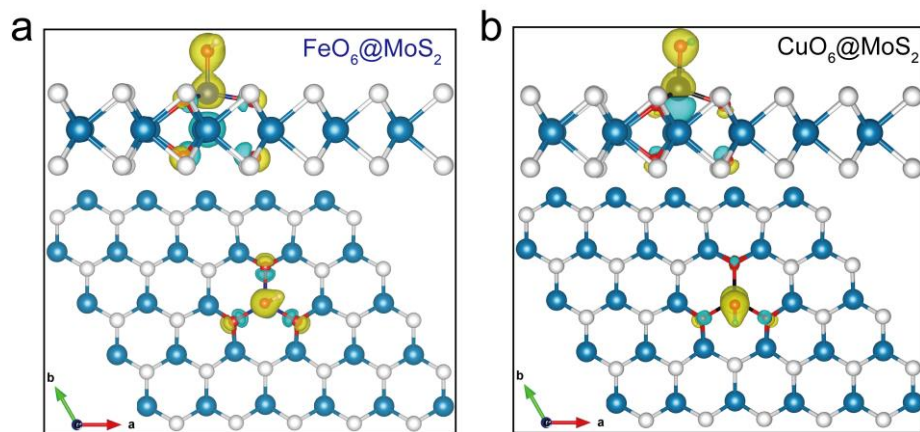

**Figure S9.** The charge density difference of before adsorption and after desorption on transition metal atom (TM) co-doped with six oxygen atoms in 2H phase MoS<sub>2</sub>. **a**, FeO<sub>6</sub>@MoS<sub>2</sub>. **b**, CuO<sub>6</sub>@MoS<sub>2</sub>. Yellow and blue represent positive and negative 0.11 e/Å<sup>3</sup> isosurfaces, respectively.

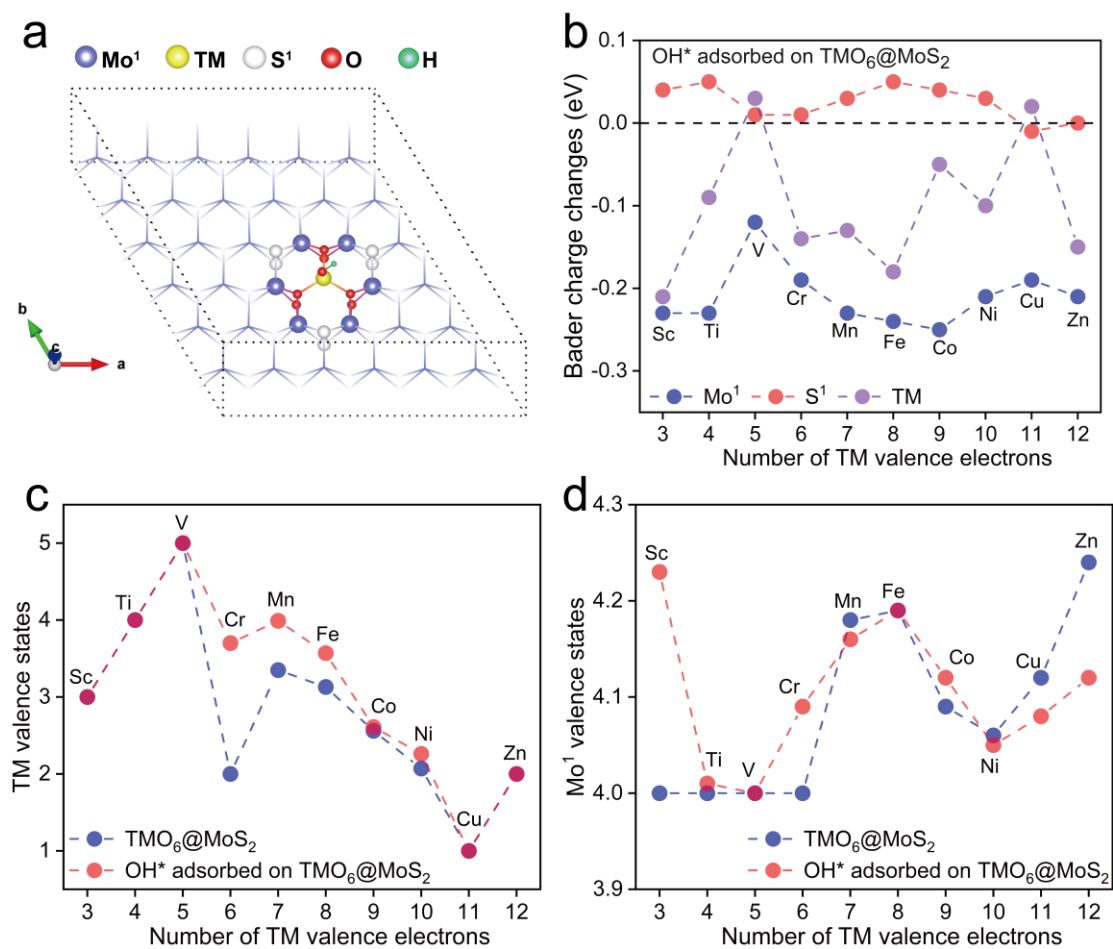

**Figure S10.** Charge changes of 3d-TMO<sub>6</sub>@MoS<sub>2</sub> structure before and after adsorption of OH\* intermediate. **a**, schematic diagram of the 3d-TMO<sub>6</sub>@MoS<sub>2</sub> structure after adsorption of the OH\* intermediate. **b**, Bader charge changes. **c**, TM valence states changes. **d**, Mo<sup>1</sup> valence states changes.

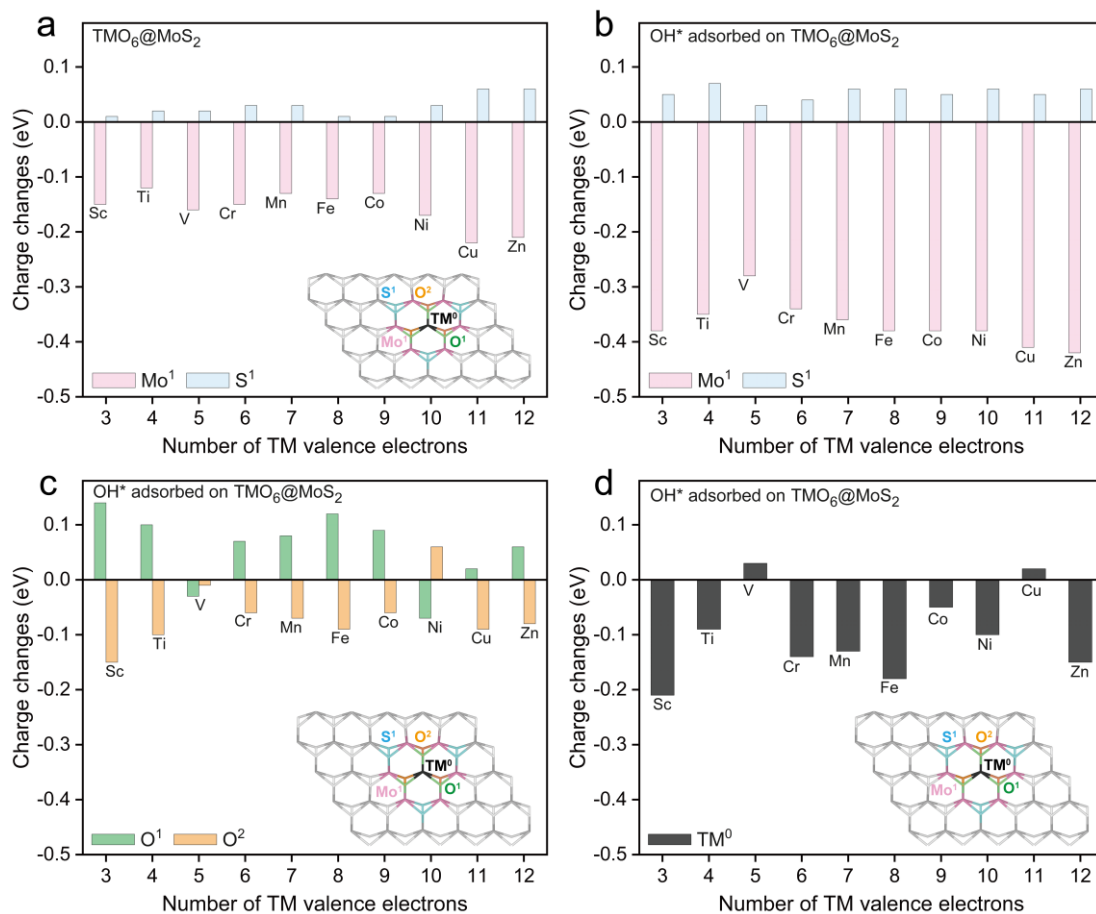

**Figure S11.** The bader charge of before adsorption and adsorption OH\* on transition metal atom (TM) co-doped with six oxygen atoms in 2H phase MoS<sub>2</sub>. **a**, the bader charge of TMO<sub>6</sub>@MoS<sub>2</sub> before adsorption. **b-d**, the bader charge of TMO<sub>6</sub>@MoS<sub>2</sub> after adsorbed OH\*.

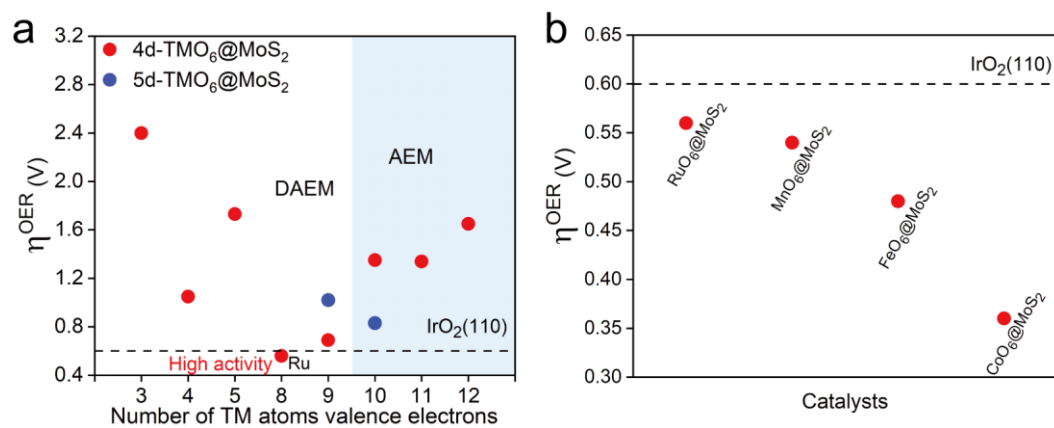

**Figure S12.** The OER theoretical overpotential on TMO<sub>6</sub>@MoS<sub>2</sub>. **a**, the theoretical OER overpotential of TMO<sub>6</sub>@MoS<sub>2</sub> (including 4d-TM=Y, Zr, Nb, Ru, Rh, Pd, Ag, Cd, Ru and 5d-TM=Ir and Pt). **b**, TMO<sub>6</sub>@MoS<sub>2</sub> (TM=Ru, Mn, Fe and Co) with a theoretical OER overpotential below IrO<sub>2</sub>(110).

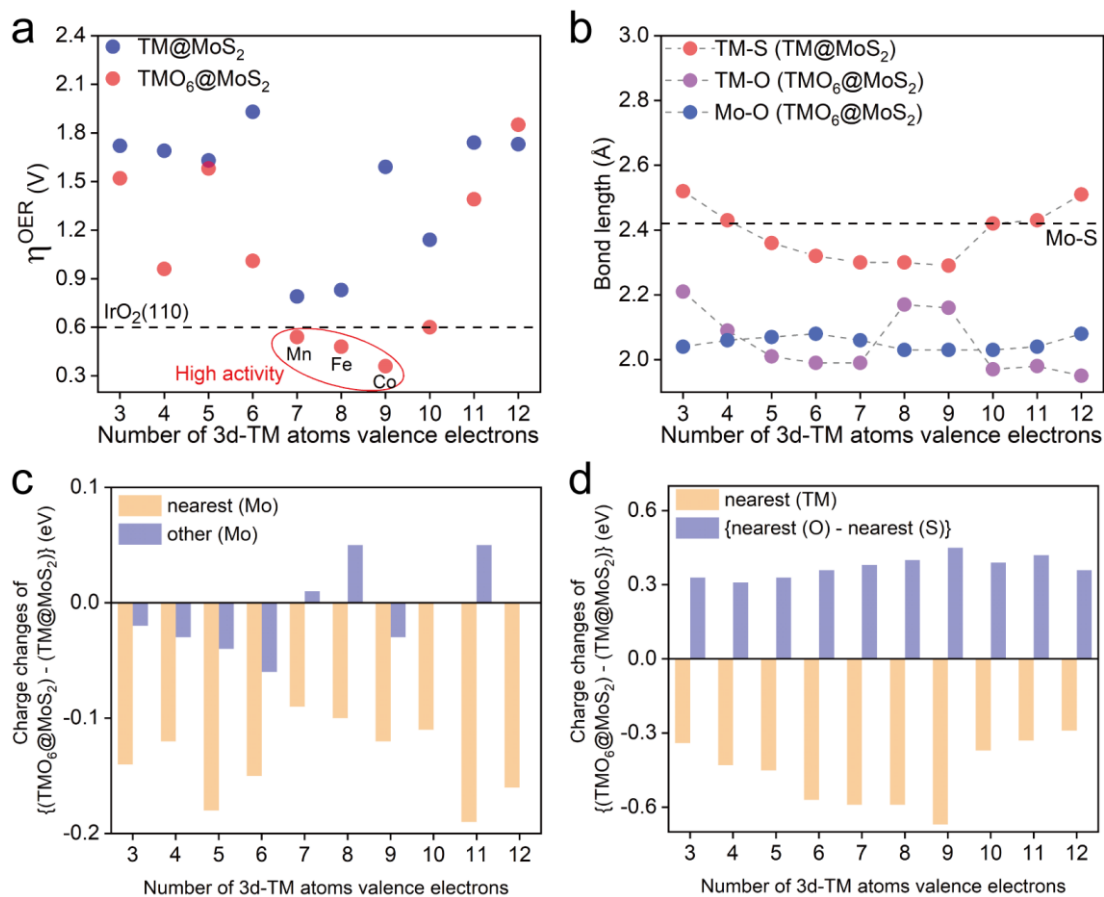

**Figure S13. a**, the OER theoretical overpotential on TMO<sub>6</sub>@MoS<sub>2</sub> and TM@MoS<sub>2</sub>.

**b**, the bond length of TMO<sub>6</sub>@MoS<sub>2</sub> and TM@MoS<sub>2</sub>. **c**, the charge changes of Mo on

TMO<sub>6</sub>@MoS<sub>2</sub> and TM@MoS<sub>2</sub>. **d**, the charge changes of TM and {nearest atom(O)-

nearest atom(S)} on TMO<sub>6</sub>@MoS<sub>2</sub> and TM@MoS<sub>2</sub>.

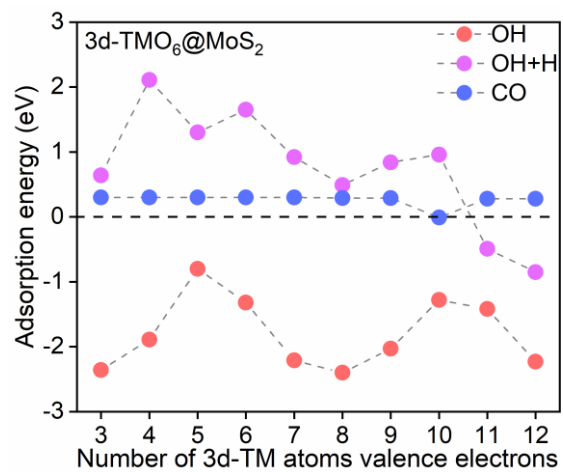

**Figure S14.** The adsorption energy of CO, OH and OH+H on 3d-TMO<sub>6</sub>@MoS<sub>2</sub>.

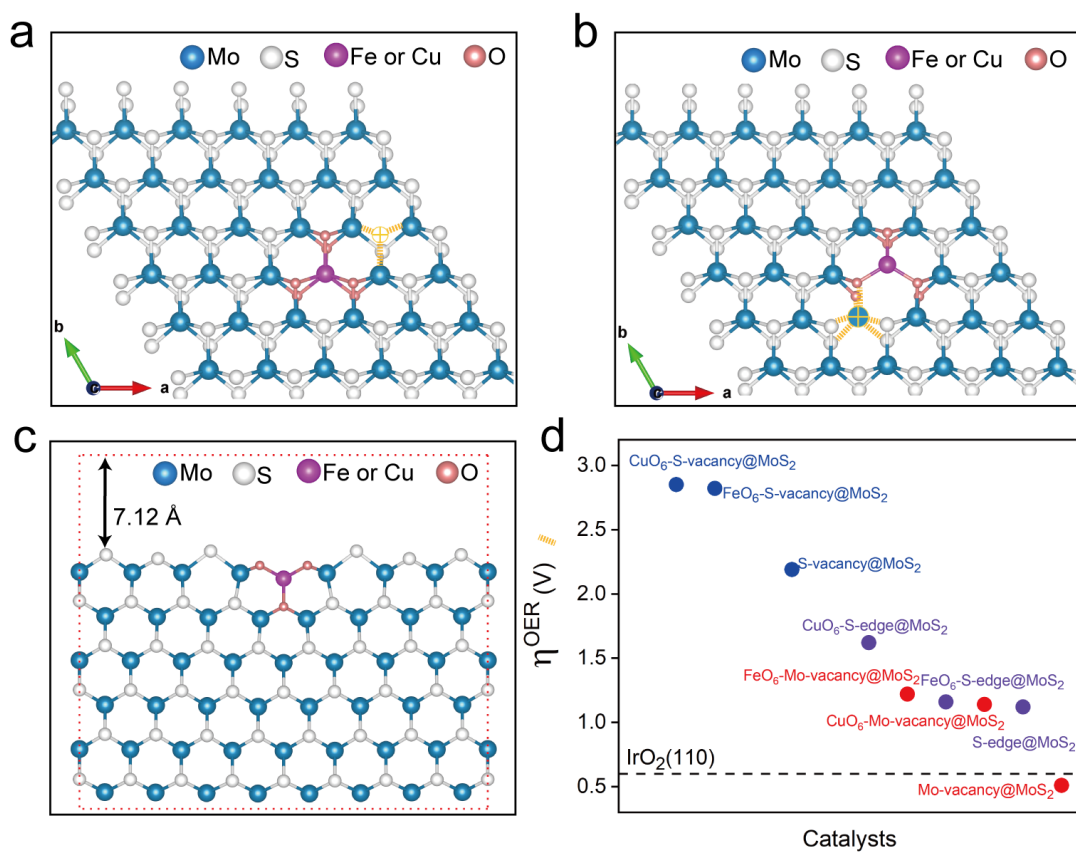

**Figure S15.** The structure and OER theoretical overpotential of TMO<sub>6</sub>@MoS<sub>2</sub> and MoS<sub>2</sub> with different defect structures (S-vacancy, Mo-vacancy, S-edge, Mo-edge). **a**, the structure of TMO<sub>6</sub>@MoS<sub>2</sub> with S-vacancy. **b**, the structure of TMO<sub>6</sub>@MoS<sub>2</sub> with Mo-vacancy. **c**, the structure of TMO<sub>6</sub>@MoS<sub>2</sub> with Mo-edge. **d**, the OER theoretical overpotential of TMO<sub>6</sub>@MoS<sub>2</sub> and MoS<sub>2</sub> with different defect structures (S-vacancy, Mo-vacancy, S-edge, Mo-edge).



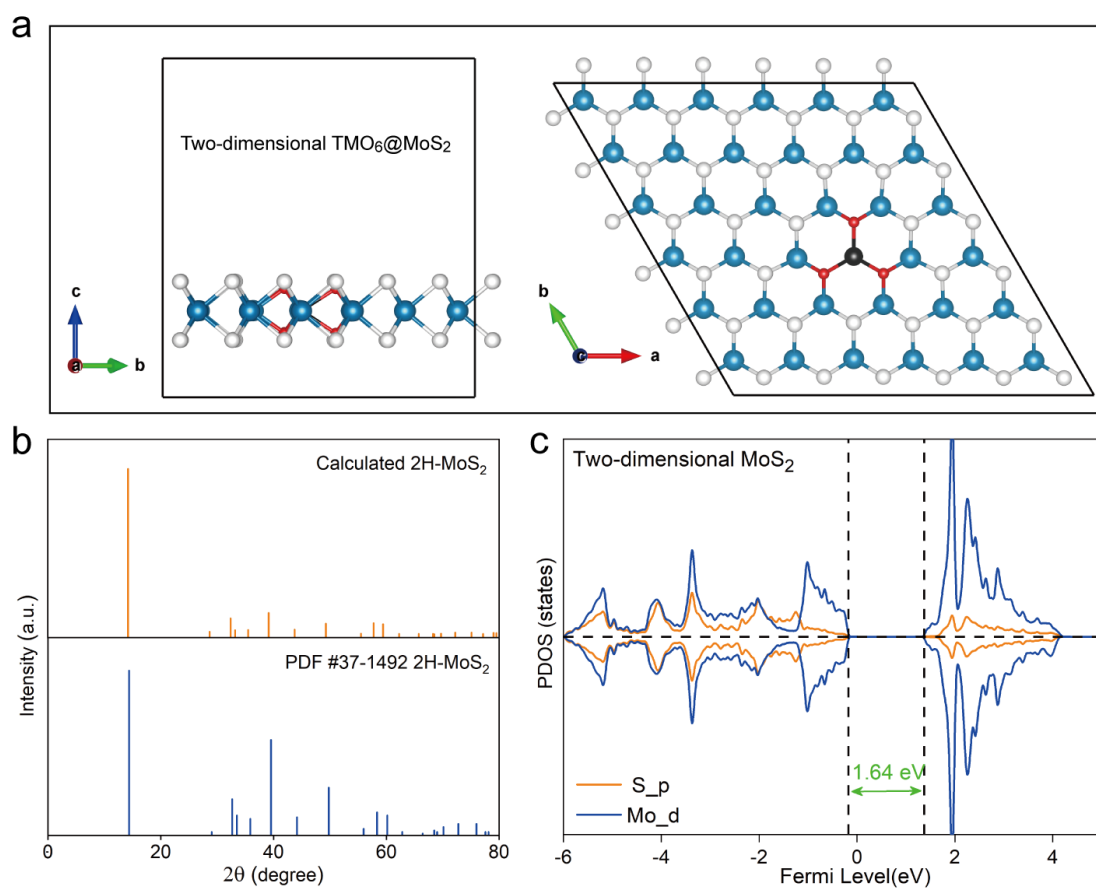

**Figure S16.** **a**, Schematic of transition metal atom co-doped with six numbers of oxygen (O) atoms in 2H phase  $\text{MoS}_2$ . **b**, Comparison between the experimental and calculated XRD patterns of 2H- $\text{MoS}_2$  (space group is  $P6_3/mmc$ ). **c**, The density of projected states (PDOS) of two-dimensional  $\text{MoS}_2$ .

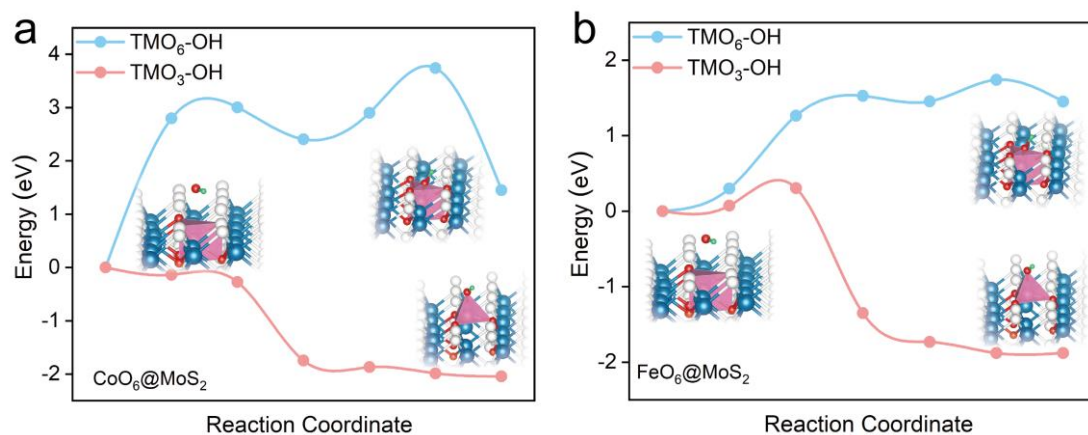

**Figure S17.** Potential barrier of tetra-coordinated structure (TMO<sub>3</sub>-OH) and hexa-coordinated structure (TMO<sub>6</sub>-OH) of TM (TM=Co and Fe) co-doped six oxygen atoms in 2H phase MoS<sub>2</sub> during OER reaction. The tetra-coordinated structure (TMO<sub>3</sub>-OH) is the active structure because it's lower thermodynamic energy and lower potential barrier.

### Supplementary Note 1. *In situ* Raman spectra of FeO<sub>6</sub>@MoS<sub>2</sub> and CuO<sub>6</sub>@MoS<sub>2</sub>

The peaks located at  $\sim 405$  and  $\sim 380$  cm<sup>-1</sup> correspond to the characteristic  $A_{1g}$  mode and  $E_{2g}^1$  mode of MoS<sub>2</sub><sup>1</sup>. In addition, the peaks in Figure S18a-b related to  $A_g-\delta(\text{OMo}_3)$  ( $\sim 337$  cm<sup>-1</sup>),  $B_{1g}-\nu(\text{OMo}_3)$  ( $\sim 453$  and  $491$  cm<sup>-1</sup>) confirmed the successful introduction of oxygen into MoS<sub>2</sub> lattice<sup>2</sup>. For sample FeO<sub>6</sub>@MoS<sub>2</sub>, Raman peak of [FeO<sub>6</sub>] at  $\sim 636$  cm<sup>-13</sup> gradually decreases and the peak of [FeO<sub>x</sub>] ( $x < 5$ ) at  $\sim 766$  cm<sup>-14</sup> appears as the applied potential increases to 1.45 V (Figure S18a). The peak at  $\sim 566$  cm<sup>-1</sup> (highlighted by gray dashed line) supports the formation of FeOOH\* species<sup>5</sup>. For sample CuO<sub>6</sub>@MoS<sub>2</sub>, Raman peak of [CuO<sub>3</sub>] at  $\sim 660$  cm<sup>-16</sup> in Figure S18b shows no change during OER process, and the CuOOH\* species<sup>7</sup> (highlighted by gray dashed line) appears when applied potential is no less than 1.65 V. These results are consistent with the theoretical predictions (Figure 3c-d).

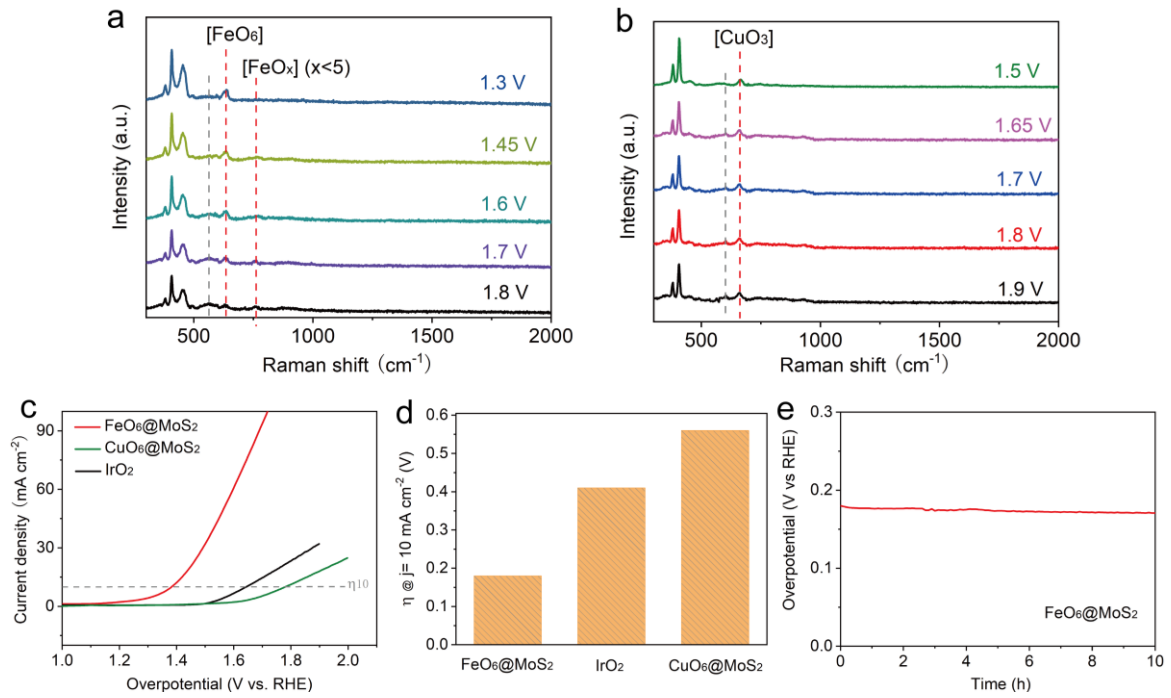

**Figure S18.** **a-b**, In-situ Raman spectra of the CuO<sub>6</sub>@MoS<sub>2</sub> and FeO<sub>6</sub>@MoS<sub>2</sub>, respectively. **c**, LSV curves and **d**, η<sub>10</sub> values of as-prepared samples CuO<sub>6</sub>@MoS<sub>2</sub>, FeO<sub>6</sub>@MoS<sub>2</sub>, and IrO<sub>2</sub>. **e**, Long-term OER stability of the FeO<sub>6</sub>@MoS<sub>2</sub> sample at a constant current of 10 mA cm<sup>-2</sup>.

## Supporting Tables

**Table S1.** The bond length of Mo-S in MoS<sub>2</sub> and TM-O in LiTMO<sub>2</sub>.

| Material systems   | Bond | Bond length (Å) |
|--------------------|------|-----------------|
| MoS <sub>2</sub>   | Mo-S | 2.40            |
| LiCoO <sub>2</sub> | Co-O | 1.94            |
| LiFeO <sub>2</sub> | Fe-O | 2.05            |
| LiMnO <sub>2</sub> | Mn-O | 1.96/ 2.34      |
| LiTiO <sub>2</sub> | Ti-O | 2.04/ 2.12      |
| LiNiO <sub>2</sub> | Ni-O | 1.91            |
| LiVO <sub>2</sub>  | V-O  | 2.06            |
| LiCrO <sub>2</sub> | Cr-O | 2.03            |
| LiZrO <sub>2</sub> | Zr-O | 2.18            |
| LiNbO <sub>2</sub> | Nb-O | 2.16            |
| LiRuO <sub>2</sub> | Ru-O | 2.09            |
| LiRhO <sub>2</sub> | Rh-O | 2.09            |

**Table S2.** Binding energy of MoO<sub>x</sub> and MoS<sub>x</sub> with different numbers of oxygen/ sulfur atoms doped in 2H phase MoS<sub>2</sub>.

| Material systems                 | MoO <sub>x</sub> binding energy (eV) | MoS <sub>x</sub> binding energy (eV) |
|----------------------------------|--------------------------------------|--------------------------------------|
| O <sub>1</sub> @MoS <sub>2</sub> | -7.47                                | -6.31                                |
| O <sub>2</sub> @MoS <sub>2</sub> | -7.43                                | -6.07                                |
| O <sub>3</sub> @MoS <sub>2</sub> | -7.41                                | -6.19                                |
| O <sub>4</sub> @MoS <sub>2</sub> | -7.48                                | -6.23                                |
| O <sub>5</sub> @MoS <sub>2</sub> | -7.44                                | -6.27                                |
| O <sub>6</sub> @MoS <sub>2</sub> | -7.52                                | -6.16                                |

**Table S3.** The formation energy ( $E_F$ ) of transition metal atom (TM) doped in 2H phase MoS<sub>2</sub>.

| Material systems    | $\Delta E_F$ (eV) |
|---------------------|-------------------|
| Sc@MoS <sub>2</sub> | -0.18             |
| Ti@MoS <sub>2</sub> | -2.06             |
| V@MoS <sub>2</sub>  | -4.02             |
| Cr@MoS <sub>2</sub> | -5.29             |
| Mn@MoS <sub>2</sub> | -4.65             |
| Fe@MoS <sub>2</sub> | -3.11             |
| Co@MoS <sub>2</sub> | -1.08             |
| Ni@MoS <sub>2</sub> | 0.99              |
| Cu@MoS <sub>2</sub> | 5.71              |
| Zn@MoS <sub>2</sub> | 9.64              |
| MoS <sub>2</sub>    | -0.69             |

**Table S4.** The formation energy ( $E_F$ ) of transition metal atom (TM) co-doped with six oxygen atoms in 2H phase MoS<sub>2</sub>.

| Material systems                   | $\Delta E_F$ (eV) |
|------------------------------------|-------------------|
| ScO <sub>6</sub> @MoS <sub>2</sub> | -3.91             |
| TiO <sub>6</sub> @MoS <sub>2</sub> | -2.50             |
| VO <sub>6</sub> @MoS <sub>2</sub>  | -3.03             |
| CrO <sub>6</sub> @MoS <sub>2</sub> | -3.33             |
| MnO <sub>6</sub> @MoS <sub>2</sub> | -2.14             |
| FeO <sub>6</sub> @MoS <sub>2</sub> | -3.00             |
| CoO <sub>6</sub> @MoS <sub>2</sub> | -2.75             |
| NiO <sub>6</sub> @MoS <sub>2</sub> | -2.73             |
| CuO <sub>6</sub> @MoS <sub>2</sub> | -4.63             |
| ZnO <sub>6</sub> @MoS <sub>2</sub> | -4.93             |
| MoS <sub>2</sub>                   | -0.69             |

**Table S5.** The energy of TM atom moving from the triangular prism crystal field to the triangular pyramid crystal field in  $\text{TMO}_6@\text{MoS}_2$ .

| Material systems            | Energy (eV) |
|-----------------------------|-------------|
| $\text{ScO}_6@\text{MoS}_2$ | 0.09        |
| $\text{TiO}_6@\text{MoS}_2$ | 0.01        |
| $\text{VO}_6@\text{MoS}_2$  | 0.01        |
| $\text{CrO}_6@\text{MoS}_2$ | 1.75        |
| $\text{MnO}_6@\text{MoS}_2$ | 0.02        |
| $\text{FeO}_6@\text{MoS}_2$ | 0.54        |
| $\text{CoO}_6@\text{MoS}_2$ | 0.77        |
| $\text{NiO}_6@\text{MoS}_2$ | -0.22       |
| $\text{CuO}_6@\text{MoS}_2$ | -0.49       |
| $\text{ZnO}_6@\text{MoS}_2$ | -0.47       |
| $\text{O}_6@\text{MoS}_2$   | 4.49        |
| $\text{MoS}_2$              | 7.99        |

**Table S6.** In  $\text{TMO}_6@\text{MoS}_2$ , when  $\text{OH}^*$  is adsorbed and  $\text{O}_2$  is desorbed respectively, the energy difference of TM atom (the triangular prism crystal field is subtracted from the triangular pyramid crystal field).

| Material systems            | Energy ( $\text{OH}^*$ ) (eV) | Energy ( $\text{O}_2$ ) (eV) |
|-----------------------------|-------------------------------|------------------------------|
| $\text{ScO}_6@\text{MoS}_2$ | -1.52                         | 0.34                         |
| $\text{TiO}_6@\text{MoS}_2$ | -1.00                         | 0.84                         |
| $\text{VO}_6@\text{MoS}_2$  | -0.91                         | 1.16                         |
| $\text{CrO}_6@\text{MoS}_2$ | -0.59                         | 1.11                         |
| $\text{MnO}_6@\text{MoS}_2$ | -0.89                         | -0.23                        |
| $\text{FeO}_6@\text{MoS}_2$ | -0.17                         | 0.61                         |
| $\text{CoO}_6@\text{MoS}_2$ | -0.90                         | -0.92                        |
| $\text{NiO}_6@\text{MoS}_2$ | -0.79                         | -0.31                        |
| $\text{CuO}_6@\text{MoS}_2$ | -0.99                         | -0.49                        |
| $\text{ZnO}_6@\text{MoS}_2$ | -1.55                         | -0.20                        |
| $\text{O}_6@\text{MoS}_2$   | 0.35                          | 1.95                         |
| $\text{MoS}_2$              | 1.72                          | 5.37                         |

**Table S7.** Adsorption free energies of OH<sup>\*</sup>, O<sup>\*</sup>, OOH<sup>\*</sup>, H<sup>\*</sup> (eV) on Pt (111), IrO<sub>2</sub> and RuO<sub>2</sub>.

| Active site            | $\Delta G_{\text{OH}}^*$ | $\Delta G_{\text{O}}^*$ | $\Delta G_{\text{OOH}}^*$ | $\Delta G_{\text{H}}^*$ |
|------------------------|--------------------------|-------------------------|---------------------------|-------------------------|
| Pt (111)               | /                        | /                       | /                         | -0.09                   |
| IrO <sub>2</sub> (110) | 0.19                     | 1.34                    | 3.09                      | /                       |
| RuO <sub>2</sub> (110) | 0.15                     | 1.62                    | 3.31                      | /                       |

**Table S8.** Theoretical overpotential for OER ( $\eta^{\text{OER}}$ , V vs RHE), theoretical overpotential ( $\eta^{\text{HER}}$ , V vs RHE) for HER on Pt (111), IrO<sub>2</sub> and RuO<sub>2</sub>.

| Active site            | $\eta^{\text{OER}}$ | $\eta^{\text{HER}}$ |
|------------------------|---------------------|---------------------|
| Pt (111)               | /                   | -0.09               |
| IrO <sub>2</sub> (110) | 0.60                | /                   |
| RuO <sub>2</sub> (110) | 0.47                | /                   |

**Table S9.** Adsorption free energies of OH<sup>\*</sup>, O<sup>\*</sup>, OOH<sup>\*</sup> (eV) on transition metal atom doped in 2H phase MoS<sub>2</sub>.

| Material systems    | $\Delta G_{\text{OH}}^*$ | $\Delta G_{\text{O}}^*$ | $\Delta G_{\text{OOH}}^*$ |
|---------------------|--------------------------|-------------------------|---------------------------|
| Sc@MoS <sub>2</sub> | 1.21                     | 1.68                    | 4.63                      |
| Ti@MoS <sub>2</sub> | 1.25                     | 1.71                    | 4.63                      |
| V@MoS <sub>2</sub>  | 1.19                     | 1.70                    | 4.56                      |
| Cr@MoS <sub>2</sub> | 2.36                     | 1.63                    | 4.79                      |
| Mn@MoS <sub>2</sub> | 1.84                     | 1.57                    | 3.59                      |
| Fe@MoS <sub>2</sub> | 1.62                     | 1.50                    | 3.56                      |
| Co@MoS <sub>2</sub> | 0.80                     | 1.48                    | 4.30                      |
| Ni@MoS <sub>2</sub> | 0.35                     | 1.47                    | 3.84                      |
| Cu@MoS <sub>2</sub> | 0.64                     | 1.15                    | 4.12                      |
| Zn@MoS <sub>2</sub> | 0.89                     | 1.39                    | 4.35                      |
| MoS <sub>2</sub>    | 2.65                     | 1.77                    | 4.92                      |



**Table S10.** Adsorption free energies of OH<sup>\*</sup>, O<sup>\*</sup>, OOH<sup>\*</sup> (eV) on transition metal atom (TM) co-doped with six oxygen atoms in 2H phase MoS<sub>2</sub>.

| Material systems                   | $\Delta G_{\text{OH}}^*$ | $\Delta G_{\text{O}}^*$ | $\Delta G_{\text{OOH}}^*$ |
|------------------------------------|--------------------------|-------------------------|---------------------------|
| ScO <sub>6</sub> @MoS <sub>2</sub> | 1.19                     | 3.94                    | 4.38                      |
| TiO <sub>6</sub> @MoS <sub>2</sub> | 1.67                     | 2.88                    | 5.07                      |
| VO <sub>6</sub> @MoS <sub>2</sub>  | 2.76                     | 2.23                    | 5.04                      |
| CrO <sub>6</sub> @MoS <sub>2</sub> | 2.24                     | 2.51                    | 4.41                      |
| MnO <sub>6</sub> @MoS <sub>2</sub> | 1.34                     | 2.43                    | 4.20                      |
| FeO <sub>6</sub> @MoS <sub>2</sub> | 1.16                     | 2.66                    | 4.36                      |
| CoO <sub>6</sub> @MoS <sub>2</sub> | 1.53                     | 2.85                    | 4.43                      |
| NiO <sub>6</sub> @MoS <sub>2</sub> | 1.83                     | 3.37                    | 4.70                      |
| CuO <sub>6</sub> @MoS <sub>2</sub> | 2.14                     | 4.75                    | 5.19                      |
| ZnO <sub>6</sub> @MoS <sub>2</sub> | 1.33                     | 4.41                    | 4.40                      |
| MoS <sub>2</sub>                   | 2.65                     | 1.77                    | 4.92                      |

**Table S11.** Theoretical overpotential for OER ( $\eta^{OER}$ , V vs RHE) on transition metal atom in 2H phase MoS<sub>2</sub>. The catalytic performance better than or comparable to IrO<sub>2</sub> is marked with red.

| Material systems    | $\eta^{OER}$ | $\eta^{HER}$ |
|---------------------|--------------|--------------|
| Sc@MoS <sub>2</sub> | 1.72         | -0.21        |
| Ti@MoS <sub>2</sub> | 1.69         | -0.31        |
| V@MoS <sub>2</sub>  | 1.63         | -0.49        |
| Cr@MoS <sub>2</sub> | 1.93         | -1.16        |
| Mn@MoS <sub>2</sub> | 0.79         | -0.71        |
| Fe@MoS <sub>2</sub> | 0.83         | -0.43        |
| Co@MoS <sub>2</sub> | 1.59         | -0.16        |
| Ni@MoS <sub>2</sub> | 1.14         | -0.56        |
| Cu@MoS <sub>2</sub> | 1.74         | -0.45        |
| Zn@MoS <sub>2</sub> | 1.73         | -0.24        |
| MoS <sub>2</sub>    | 1.92         | -2.02        |

**Table S12.** Theoretical overpotential for OER ( $\eta^{OER}$ , V vs RHE) on transition metal atom (TM) co-doped with six oxygen atoms in 2H phase MoS<sub>2</sub>. The catalytic performance better than or comparable to IrO<sub>2</sub> is marked with red.

| Material systems                   | $\eta^{OER}$ |
|------------------------------------|--------------|
| ScO <sub>6</sub> @MoS <sub>2</sub> | 1.52         |
| TiO <sub>6</sub> @MoS <sub>2</sub> | 0.96         |
| VO <sub>6</sub> @MoS <sub>2</sub>  | 1.58         |
| CrO <sub>6</sub> @MoS <sub>2</sub> | 1.01         |
| MnO <sub>6</sub> @MoS <sub>2</sub> | 0.54         |
| FeO <sub>6</sub> @MoS <sub>2</sub> | 0.48         |
| CoO <sub>6</sub> @MoS <sub>2</sub> | 0.36         |
| NiO <sub>6</sub> @MoS <sub>2</sub> | 0.60         |
| CuO <sub>6</sub> @MoS <sub>2</sub> | 1.39         |
| ZnO <sub>6</sub> @MoS <sub>2</sub> | 1.85         |
| MoS <sub>2</sub>                   | 1.92         |

**Table S13.** The overpotential ( $\eta^{OER}$ ) for oxygen evolution of experimental (measured at 1M KOH electrolyte and a current density of 10 mA/cm<sup>2</sup>) value and calculated value in this paper.

| Catalyst                                   | Current density (mA/cm <sup>2</sup> ) | Experimental $\eta^{OER}$ (V) | DFT $\eta^{OER}$ (V) | Refs |
|--------------------------------------------|---------------------------------------|-------------------------------|----------------------|------|
| Ni@MoS <sub>2</sub>                        | 10                                    | 0.365                         | 1.14                 | 8    |
| MoS <sub>2</sub>                           | 10                                    | 0.403                         | 1.92                 | 9    |
| Co@MoS <sub>2</sub>                        | 10                                    | 0.294                         | 1.59                 | 9    |
| Fe@MoS <sub>2</sub>                        | 50                                    | 0.290                         | 0.83                 | 10   |
| Co@MoS <sub>2</sub>                        | 10                                    | 0.260                         | 1.59                 | 11   |
| MoS <sub>2</sub>                           | 10                                    | 0.420                         | 1.92                 | 11   |
| Co@MoS <sub>2</sub>                        | 10                                    | 0.270                         | 1.59                 | 12   |
| MoS <sub>2</sub>                           | 10                                    | 0.392                         | 1.92                 | 12   |
| IrO <sub>2</sub>                           | 10                                    | 0.314                         | 0.60                 | 13   |
| RuO <sub>2</sub>                           | 10                                    | 0.210                         | 0.47                 | 11   |
| IrO <sub>2</sub>                           | 10                                    | 0.468                         | 0.60                 | 14   |
| NiVIr-LDH                                  | 10                                    | 0.18                          |                      | 15   |
| Ni <sub>0.75</sub> V <sub>0.25</sub> -LDH  | 10                                    | 0.31                          |                      | 16   |
| Ni <sub>0.75</sub> Fe <sub>0.25</sub> -LDH | 10                                    | 0.25                          |                      | 16   |
| NiFeMn-LDH                                 | 10                                    | 0.262                         |                      | 17   |

|                                                         |    |       |      |    |
|---------------------------------------------------------|----|-------|------|----|
| Ni <sub>3</sub> Fe <sub>0.5</sub> V <sub>0.5</sub> -LDH | 10 | 0.20  |      | 18 |
| NiFe-LDH                                                | 10 | 0.36  |      | 19 |
| NiFe-LDH                                                | 10 | 0.329 |      | 20 |
| TiNiFe-LDH                                              | 10 | 0.307 |      | 20 |
| VNiFe-LDH                                               | 10 | 0.287 |      | 20 |
| CrNiFe-LDH                                              | 10 | 0.295 |      | 20 |
| MnNiFe-LDH                                              | 10 | 0.313 |      | 20 |
| CoNiFe-LDH                                              | 10 | 0.290 |      | 20 |
| CuNiFe-LDH                                              | 10 | 0.317 |      | 20 |
| ZnNiFe-LDH                                              | 10 | 0.325 |      | 20 |
| MgNiFe-LDH                                              | 10 | 0.372 |      | 20 |
| AlNiFe-LDH                                              | 10 | 0.374 |      | 20 |
| Ni@MoS <sub>2</sub>                                     | 10 | 1.08  | 1.14 | 21 |
| Fe@MoS <sub>2</sub>                                     | 10 | 1.10  | 0.83 | 10 |

**Table S14.** O<sup>2</sup>-TM bond length changes on transition metal atom (TM) co-doped with six oxygen atoms in 2H phase MoS<sub>2</sub>, Where B<sup>1</sup> represents the bond length of O<sup>2</sup>-TM, B<sup>2</sup> represents the bond length of O<sup>2</sup>-TM after adsorbed OH\*, B<sup>3</sup> represents the bond length of O<sup>2</sup>-TM after adsorbed O\*, B<sup>4</sup> represents the bond length of O<sup>2</sup>-TM after adsorbed OOH\*, B<sup>5</sup> represents the bond length of O<sup>2</sup>-TM after desorbed.

| Material systems                   | B <sup>1</sup> | B <sup>2</sup> | B <sup>3</sup> | B <sup>4</sup> | B <sup>5</sup> |
|------------------------------------|----------------|----------------|----------------|----------------|----------------|
| ScO <sub>6</sub> @MoS <sub>2</sub> | 2.20           | 3.62           | 3.76           | 3.62           | 2.21           |
| TiO <sub>6</sub> @MoS <sub>2</sub> | 2.09           | 3.39           | 3.53           | 3.32           | 2.08           |
| VO <sub>6</sub> @MoS <sub>2</sub>  | 2.02           | 2.16           | 3.41           | 3.25           | 3.05           |
| CrO <sub>6</sub> @MoS <sub>2</sub> | 1.99           | 3.28           | 3.41           | 3.14           | 1.99           |
| MnO <sub>6</sub> @MoS <sub>2</sub> | 2.06           | 3.18           | 3.52           | 3.11           | 2.49           |
| FeO <sub>6</sub> @MoS <sub>2</sub> | 2.14           | 3.43           | 3.34           | 3.35           | 2.17           |
| CoO <sub>6</sub> @MoS <sub>2</sub> | 2.18           | 3.40           | 3.43           | 3.24           | 2.82           |
| NiO <sub>6</sub> @MoS <sub>2</sub> | 2.07           | 1.99           | 2.00           | 1.95           | 1.95           |
| CuO <sub>6</sub> @MoS <sub>2</sub> | 3.03           | 3.50           | 3.60           | 3.38           | 3.04           |
| ZnO <sub>6</sub> @MoS <sub>2</sub> | 3.12           | 3.72           | 3.76           | 3.54           | 3.13           |

**Table S15.** The atomic magnetic moment of on transition metal atom (TM) co-doped with six oxygen atoms in 2H phase MoS<sub>2</sub> before adsorption, including nearest neighbor

Mo atoms ( $\text{Mo}^1$ ), O on the same side of OH adsorbent ( $\text{O}^1$ ), O on the opposite side of OH\* adsorbent ( $\text{O}^2$ ) and transition metal atom (TM).

| Material systems     | $\text{Mo}^1$ | $\text{O}^1$ | $\text{O}^2$ | TM   |
|----------------------|---------------|--------------|--------------|------|
| $\text{ScO}_6@MoS_2$ | 0.00          | 0.00         | 0.00         | 0.00 |
| $\text{TiO}_6@MoS_2$ | 0.00          | 0.00         | 0.00         | 0.00 |
| $\text{VO}_6@MoS_2$  | 0.00          | 0.00         | 0.00         | 0.00 |
| $\text{CrO}_6@MoS_2$ | 0.00          | 0.00         | 0.00         | 0.00 |
| $\text{MnO}_6@MoS_2$ | 0.18          | 0.01         | 0.03         | 2.35 |
| $\text{FeO}_6@MoS_2$ | 0.19          | 0.04         | 0.04         | 3.13 |
| $\text{CoO}_6@MoS_2$ | 0.09          | 0.02         | 0.03         | 2.44 |
| $\text{NiO}_6@MoS_2$ | 0.06          | 0.06         | 0.06         | 1.07 |
| $\text{CuO}_6@MoS_2$ | 0.12          | 0.02         | 0.00         | 0.14 |
| $\text{ZnO}_6@MoS_2$ | 0.24          | 0.02         | 0.01         | 0.02 |

**Table S16.** The atomic magnetic moment of on transition metal atom (TM) co-doped with six oxygen atoms in 2H phase  $\text{MoS}_2$  after desorption, including nearest neighbor Mo atoms ( $\text{Mo}^1$ ), O on the same side of OH adsorbent ( $\text{O}^1$ ), O on the opposite side of OH\* adsorbent ( $\text{O}^2$ ) and transition metal atom (TM).

| Material systems     | $\text{Mo}^1$ | $\text{O}^1$ | $\text{O}^2$ | TM   |
|----------------------|---------------|--------------|--------------|------|
| $\text{ScO}_6@MoS_2$ | 0.23          | 0.00         | 0.02         | 0.02 |
| $\text{TiO}_6@MoS_2$ | 0.01          | 0.00         | 0.00         | 0.00 |
| $\text{VO}_6@MoS_2$  | 0.00          | 0.00         | 0.00         | 0.00 |
| $\text{CrO}_6@MoS_2$ | 0.09          | 0.02         | 0.01         | 1.70 |
| $\text{MnO}_6@MoS_2$ | 0.16          | 0.01         | 0.01         | 2.99 |
| $\text{FeO}_6@MoS_2$ | 0.19          | 0.07         | 0.02         | 3.57 |
| $\text{CoO}_6@MoS_2$ | 0.12          | 0.07         | 0.01         | 2.39 |
| $\text{NiO}_6@MoS_2$ | 0.05          | 0.07         | 0.07         | 1.26 |
| $\text{CuO}_6@MoS_2$ | 0.08          | 0.07         | 0.02         | 0.05 |
| $\text{ZnO}_6@MoS_2$ | 0.12          | 0.04         | 0.02         | 0.01 |

**Table S17.** The valence state of on transition metal atom (TM) co-doped with six oxygen atoms in 2H phase  $\text{MoS}_2$  before adsorption, including nearest neighbor Mo

atoms ( $\text{Mo}^1$ ), O on the same side of OH adsorbent ( $\text{O}^1$ ), O on the opposite side of  $\text{OH}^*$  adsorbent ( $\text{O}^2$ ) and transition metal atom (TM).

| Material systems             | $\text{Mo}^1$ | $\text{O}^1$ | $\text{O}^2$ | TM    |
|------------------------------|---------------|--------------|--------------|-------|
| $\text{ScO}_6@ \text{MoS}_2$ | +4            | -2           | -2           | +3    |
| $\text{TiO}_6@ \text{MoS}_2$ | +4            | -2           | -2           | +4    |
| $\text{VO}_6@ \text{MoS}_2$  | +4            | -2           | -2           | +5    |
| $\text{CrO}_6@ \text{MoS}_2$ | +4            | -2           | -2           | +2    |
| $\text{MnO}_6@ \text{MoS}_2$ | +4.18         | -2           | -2           | +3.35 |
| $\text{FeO}_6@ \text{MoS}_2$ | +4.19         | -2           | -2           | +3.13 |
| $\text{CoO}_6@ \text{MoS}_2$ | +4.09         | -2           | -2           | +2.56 |
| $\text{NiO}_6@ \text{MoS}_2$ | +4.06         | -2           | -2           | +2.07 |
| $\text{CuO}_6@ \text{MoS}_2$ | +4.12         | -2           | -2           | +1    |
| $\text{ZnO}_6@ \text{MoS}_2$ | +4.24         | -2           | -2           | +2    |

**Table S18.** The valence state of on transition metal atom (TM) co-doped with six oxygen atoms in 2H phase  $\text{MoS}_2$  after desorption, including nearest neighbor Mo atoms ( $\text{Mo}^1$ ), O on the same side of OH adsorbent ( $\text{O}^1$ ), O on the opposite side of  $\text{OH}^*$  adsorbent ( $\text{O}^2$ ) and transition metal atom (TM).

| Material systems             | $\text{Mo}^1$ | $\text{O}^1$ | $\text{O}^2$ | TM    |
|------------------------------|---------------|--------------|--------------|-------|
| $\text{ScO}_6@ \text{MoS}_2$ | +4.23         | -2           | -2           | +3    |
| $\text{TiO}_6@ \text{MoS}_2$ | +4.01         | -2           | -2           | +4    |
| $\text{VO}_6@ \text{MoS}_2$  | +4            | -2           | -2           | +5    |
| $\text{CrO}_6@ \text{MoS}_2$ | +4.09         | -2           | -2           | +3.7  |
| $\text{MnO}_6@ \text{MoS}_2$ | +4.16         | -2           | -2           | +3.99 |
| $\text{FeO}_6@ \text{MoS}_2$ | +4.19         | -2           | -2           | +3.57 |
| $\text{CoO}_6@ \text{MoS}_2$ | +4.12         | -2           | -2           | +2.61 |
| $\text{NiO}_6@ \text{MoS}_2$ | +4.05         | -2           | -2           | +2.26 |
| $\text{CuO}_6@ \text{MoS}_2$ | +4.08         | -2           | -2           | +1    |
| $\text{ZnO}_6@ \text{MoS}_2$ | +4.12         | -2           | -2           | +2    |

**Table S19.** The bader charge of transition metal atom (TM) co-doped with six oxygen atoms in 2H phase  $\text{MoS}_2$ , including nearest neighbor Mo atoms ( $\text{Mo}^1$ ), other Mo atoms

(Mo<sup>2</sup>), nearest neighbor S atoms (S<sup>1</sup>), other S atoms (S<sup>2</sup>), O atom (O<sup>0</sup>) and transition metal atom (TM).

| Material systems                   | Mo <sup>1</sup> | Mo <sup>2</sup> | S <sup>1</sup> | S <sup>2</sup> | O <sup>0</sup> | TM    |
|------------------------------------|-----------------|-----------------|----------------|----------------|----------------|-------|
| ScO <sub>6</sub> @MoS <sub>2</sub> | 4.87            | 5.02            | 6.49           | 6.48           | 6.92           | 9.17  |
| TiO <sub>6</sub> @MoS <sub>2</sub> | 4.90            | 5.02            | 6.49           | 6.47           | 6.88           | 2.27  |
| VO <sub>6</sub> @MoS <sub>2</sub>  | 4.85            | 5.01            | 6.50           | 6.48           | 6.86           | 3.41  |
| CrO <sub>6</sub> @MoS <sub>2</sub> | 4.85            | 5.00            | 6.51           | 6.48           | 6.85           | 4.54  |
| MnO <sub>6</sub> @MoS <sub>2</sub> | 4.88            | 5.01            | 6.50           | 6.47           | 6.85           | 5.67  |
| FeO <sub>6</sub> @MoS <sub>2</sub> | 4.87            | 5.01            | 6.48           | 6.47           | 6.86           | 6.74  |
| CoO <sub>6</sub> @MoS <sub>2</sub> | 4.89            | 5.02            | 6.48           | 6.47           | 6.83           | 7.86  |
| NiO <sub>6</sub> @MoS <sub>2</sub> | 4.84            | 5.01            | 6.50           | 6.47           | 6.84           | 9.09  |
| CuO <sub>6</sub> @MoS <sub>2</sub> | 4.80            | 5.02            | 6.53           | 6.47           | 6.86           | 10.10 |
| ZnO <sub>6</sub> @MoS <sub>2</sub> | 4.80            | 5.01            | 6.53           | 6.47           | 6.88           | 10.90 |

**Table S20.** The bader charge of OH\* absorbed on transition metal atom (TM) co-doped with six oxygen atoms in 2H phase MoS<sub>2</sub>, including nearest neighbor Mo atoms (Mo<sup>1</sup>), other Mo atoms (Mo<sup>2</sup>), nearest neighbor S atoms (S<sup>1</sup>), other S atoms (S<sup>2</sup>), O on the same side of OH adsorbent (O<sup>1</sup>), O on the opposite side of OH\* adsorbent (O<sup>2</sup>), O in OH\* adsorbent (O<sup>3</sup>), H in OH\* adsorbent (H<sup>0</sup>) and transition metal atom (TM).

| Material systems                   | Mo <sup>1</sup> | Mo <sup>2</sup> | S <sup>1</sup> | S <sup>2</sup> | O <sup>1</sup> | O <sup>2</sup> | O <sup>3</sup> | H <sup>0</sup> | TM    |
|------------------------------------|-----------------|-----------------|----------------|----------------|----------------|----------------|----------------|----------------|-------|
| ScO <sub>6</sub> @MoS <sub>2</sub> | 4.64            | 5.02            | 6.53           | 6.49           | 7.06           | 6.77           | 7.44           | 0.20           | 8.96  |
| TiO <sub>6</sub> @MoS <sub>2</sub> | 4.67            | 5.01            | 6.54           | 6.49           | 6.98           | 6.78           | 7.16           | 0.21           | 2.18  |
| VO <sub>6</sub> @MoS <sub>2</sub>  | 4.73            | 5.00            | 6.51           | 6.49           | 6.83           | 6.85           | 6.99           | 0.23           | 3.44  |
| CrO <sub>6</sub> @MoS <sub>2</sub> | 4.66            | 5.03            | 6.52           | 6.48           | 6.92           | 6.79           | 7.08           | 0.22           | 4.40  |
| MnO <sub>6</sub> @MoS <sub>2</sub> | 4.65            | 5.02            | 6.53           | 6.49           | 6.93           | 6.78           | 6.98           | 0.36           | 5.54  |
| FeO <sub>6</sub> @MoS <sub>2</sub> | 4.63            | 5.01            | 6.53           | 6.49           | 6.98           | 6.77           | 7.17           | 0.21           | 6.56  |
| CoO <sub>6</sub> @MoS <sub>2</sub> | 4.64            | 5.01            | 6.52           | 6.49           | 6.92           | 6.77           | 6.95           | 0.32           | 7.81  |
| NiO <sub>6</sub> @MoS <sub>2</sub> | 4.63            | 5.02            | 6.53           | 6.48           | 6.77           | 6.90           | 7.18           | 0.00           | 8.99  |
| CuO <sub>6</sub> @MoS <sub>2</sub> | 4.61            | 5.03            | 6.52           | 6.48           | 6.88           | 6.77           | 7.25           | 0.00           | 10.12 |
| ZnO <sub>6</sub> @MoS <sub>2</sub> | 4.59            | 5.04            | 6.53           | 6.47           | 6.94           | 6.80           | 7.39           | 0.00           | 10.75 |

**Table S21.** Values used for the entropy and zero-point energy corrections in determining the free energy of reactants, products, and intermediate species adsorbed on catalysts. For the adsorbates, the  $\Delta ZPE$  values are averaged over all transition metal atom doped in 2H phase MoS<sub>2</sub> catalyst systems since they have rather close value.

| Species             | TS (eV)(298K) | ZPE (eV) |
|---------------------|---------------|----------|
| H*                  | 0             | 0.17     |
| O*                  | 0             | 0.07     |
| OH*                 | 0             | 0.33     |
| OOH*                | 0             | 0.43     |
| H <sub>2</sub> (g)  | 0.41          | 0.27     |
| H <sub>2</sub> O(g) | 0.58          | 0.57     |

**Table S22.** Adsorption free energies of OH\*, O\*, OOH\* (eV) and theoretical overpotential for OER ( $\eta^{OER}$ , V vs RHE) on transition metal atom co-doped with six oxygen atoms in 2H phase MoS<sub>2</sub>. The catalytic performance better than or comparable to IrO<sub>2</sub> is marked with red.

| Material systems                   | $\Delta G_{OH^*}$ | $\Delta G_{O^*}$ | $\Delta G_{OOH^*}$ | $\eta^{OER}$ |
|------------------------------------|-------------------|------------------|--------------------|--------------|
| YO <sub>6</sub> @MoS <sub>2</sub>  | 1.05              | 4.68             | 4.76               | 2.40         |
| ZrO <sub>6</sub> @MoS <sub>2</sub> | 2.17              | 4.45             | 4.99               | 1.05         |
| NbO <sub>6</sub> @MoS <sub>2</sub> | 2.06              | 2.62             | 5.59               | 1.73         |
| RuO <sub>6</sub> @MoS <sub>2</sub> | 1.79              | 3.58             | 4.63               | 0.56         |
| RhO <sub>6</sub> @MoS <sub>2</sub> | 1.64              | 3.56             | 4.31               | 0.69         |
| PdO <sub>6</sub> @MoS <sub>2</sub> | 2.58              | 4.64             | 5.13               | 1.35         |
| AgO <sub>6</sub> @MoS <sub>2</sub> | 2.57              | 4.65             | 5.25               | 1.34         |
| CdO <sub>6</sub> @MoS <sub>2</sub> | 1.33              | 4.22             | 4.35               | 1.65         |
| IrO <sub>6</sub> @MoS <sub>2</sub> | 2.25              | 3.52             | 4.46               | 1.02         |
| PtO <sub>6</sub> @MoS <sub>2</sub> | 2.06              | 3.86             | 5.12               | 0.83         |

**Table S23.** Adsorption free energies of OH\*, O\*, OOH\* (eV) and theoretical overpotential for OER ( $\eta^{OER}$ , V vs RHE) on transition metal atom co-doped with six

oxygen atoms and transition metal atom doped in 2H phase MoS<sub>2</sub>, respectively. The catalytic performance better than or comparable to IrO<sub>2</sub> is marked with red.

| Species                            | $\Delta G_{OH}^*$ | $\Delta G_O^*$ | $\Delta G_{OOH}^*$ | $\eta^{OER}$ |
|------------------------------------|-------------------|----------------|--------------------|--------------|
| Sc@MoS <sub>2</sub>                | 1.21              | 1.68           | 4.63               | 1.72         |
| Ti@MoS <sub>2</sub>                | 1.25              | 1.71           | 4.63               | 1.69         |
| V@MoS <sub>2</sub>                 | 1.19              | 1.70           | 4.56               | 1.63         |
| Cr@MoS <sub>2</sub>                | 2.36              | 1.63           | 4.79               | 1.93         |
| Mn@MoS <sub>2</sub>                | 1.84              | 1.57           | 3.59               | 0.79         |
| Fe@MoS <sub>2</sub>                | 1.62              | 1.50           | 3.56               | 0.83         |
| Co@MoS <sub>2</sub>                | 0.80              | 1.48           | 4.30               | 1.59         |
| Ni@MoS <sub>2</sub>                | 0.35              | 1.47           | 3.84               | 1.14         |
| Cu@MoS <sub>2</sub>                | 0.64              | 1.15           | 4.12               | 1.74         |
| Zn@MoS <sub>2</sub>                | 0.89              | 1.39           | 4.35               | 1.73         |
| MoS <sub>2</sub>                   | 2.65              | 1.77           | 4.92               | 1.92         |
| ScO <sub>6</sub> @MoS <sub>2</sub> | 1.19              | 3.94           | 4.38               | 1.52         |
| TiO <sub>6</sub> @MoS <sub>2</sub> | 1.67              | 2.88           | 5.07               | 0.96         |
| VO <sub>6</sub> @MoS <sub>2</sub>  | 2.76              | 2.23           | 5.04               | 1.58         |
| CrO <sub>6</sub> @MoS <sub>2</sub> | 2.24              | 2.51           | 4.41               | 1.01         |
| MnO <sub>6</sub> @MoS <sub>2</sub> | 1.34              | 2.43           | 4.20               | 0.54         |
| FeO <sub>6</sub> @MoS <sub>2</sub> | 1.16              | 2.66           | 4.36               | 0.48         |
| CoO <sub>6</sub> @MoS <sub>2</sub> | 1.53              | 2.85           | 4.43               | 0.36         |
| NiO <sub>6</sub> @MoS <sub>2</sub> | 1.83              | 3.37           | 4.70               | 0.60         |
| CuO <sub>6</sub> @MoS <sub>2</sub> | 2.14              | 4.75           | 5.19               | 1.39         |
| ZnO <sub>6</sub> @MoS <sub>2</sub> | 1.33              | 4.41           | 4.40               | 1.85         |

**Table S24.** The bader charge of transition metal atom (TM) co-doped with six oxygen atoms in 2H phase MoS<sub>2</sub>, and the bader charge of transition metal atom (TM) doped in 2H phase MoS<sub>2</sub>, including nearest neighbor Mo atoms (Mo<sup>1</sup>), other Mo atoms (Mo<sup>2</sup>), nearest neighbor S atoms (S<sup>1</sup>), other S atoms (S<sup>2</sup>), O atom (O<sup>0</sup>) and transition metal atom (TM).

| Material systems    | Mo <sup>1</sup> | Mo <sup>2</sup> | S <sup>1</sup> | S <sup>2</sup> | O <sup>0</sup> | TM   |
|---------------------|-----------------|-----------------|----------------|----------------|----------------|------|
| Sc@MoS <sub>2</sub> | 5.01            | 5.04            | 6.59           | 6.48           | /              | 9.51 |
| Ti@MoS <sub>2</sub> | 5.02            | 5.05            | 6.57           | 6.47           | /              | 2.70 |
| V@MoS <sub>2</sub>  | 5.03            | 5.05            | 6.53           | 6.47           | /              | 3.86 |



|                                    |      |      |      |      |      |       |
|------------------------------------|------|------|------|------|------|-------|
| Cr@MoS <sub>2</sub>                | 5.00 | 5.06 | 6.49 | 6.47 | /    | 5.11  |
| Mn@MoS <sub>2</sub>                | 4.97 | 5.00 | 6.47 | 6.50 | /    | 6.26  |
| Fe@MoS <sub>2</sub>                | 4.97 | 4.96 | 6.46 | 6.52 | /    | 7.33  |
| Co@MoS <sub>2</sub>                | 5.01 | 5.05 | 6.38 | 6.48 | /    | 8.53  |
| Ni@MoS <sub>2</sub>                | 4.95 | 5.01 | 6.45 | 6.49 | /    | 9.46  |
| Cu@MoS <sub>2</sub>                | 4.99 | 4.97 | 6.44 | 6.51 | /    | 10.43 |
| Zn@MoS <sub>2</sub>                | 4.96 | 5.01 | 6.52 | 6.49 | /    | 11.19 |
| MoS <sub>2</sub>                   | 5.04 | 5.05 | 6.48 | 6.47 | /    | 5.07  |
| ScO <sub>6</sub> @MoS <sub>2</sub> | 4.87 | 5.02 | 6.49 | 6.48 | 6.92 | 9.17  |
| TiO <sub>6</sub> @MoS <sub>2</sub> | 4.90 | 5.02 | 6.49 | 6.47 | 6.88 | 2.27  |
| VO <sub>6</sub> @MoS <sub>2</sub>  | 4.85 | 5.01 | 6.50 | 6.48 | 6.86 | 3.41  |
| CrO <sub>6</sub> @MoS <sub>2</sub> | 4.85 | 5.00 | 6.51 | 6.48 | 6.85 | 4.54  |
| MnO <sub>6</sub> @MoS <sub>2</sub> | 4.88 | 5.01 | 6.50 | 6.47 | 6.85 | 5.67  |
| FeO <sub>6</sub> @MoS <sub>2</sub> | 4.87 | 5.01 | 6.48 | 6.47 | 6.86 | 6.74  |
| CoO <sub>6</sub> @MoS <sub>2</sub> | 4.89 | 5.02 | 6.48 | 6.47 | 6.83 | 7.86  |
| NiO <sub>6</sub> @MoS <sub>2</sub> | 4.84 | 5.01 | 6.50 | 6.47 | 6.84 | 9.09  |
| CuO <sub>6</sub> @MoS <sub>2</sub> | 4.80 | 5.02 | 6.53 | 6.47 | 6.86 | 10.10 |
| ZnO <sub>6</sub> @MoS <sub>2</sub> | 4.80 | 5.01 | 6.53 | 6.47 | 6.88 | 10.90 |

**Table S25.** The bond length of transition metal atom (TM) co-doped with six oxygen atoms in 2H phase MoS<sub>2</sub>, and the bond length of transition metal atom (TM) doped in 2H phase MoS<sub>2</sub>, including nearest neighbor Mo atoms (Mo), nearest neighbor S atoms (S), O atom (O) and transition metal atom (TM).

| Material systems                   | Mo-S | Mo-O | TM-O | TM-S |
|------------------------------------|------|------|------|------|
| Sc@MoS <sub>2</sub>                | 2.40 | /    | /    | 2.52 |
| Ti@MoS <sub>2</sub>                | 2.40 | /    | /    | 2.43 |
| V@MoS <sub>2</sub>                 | 2.41 | /    | /    | 2.36 |
| Cr@MoS <sub>2</sub>                | 2.41 | /    | /    | 2.32 |
| Mn@MoS <sub>2</sub>                | 2.42 | /    | /    | 2.30 |
| Fe@MoS <sub>2</sub>                | 2.42 | /    | /    | 2.30 |
| Co@MoS <sub>2</sub>                | 2.42 | /    | /    | 2.29 |
| Ni@MoS <sub>2</sub>                | 2.40 | /    | /    | 2.42 |
| Cu@MoS <sub>2</sub>                | 2.42 | /    | /    | 2.43 |
| Zn@MoS <sub>2</sub>                | 2.40 | /    | /    | 2.51 |
| MoS <sub>2</sub>                   | 2.41 | /    | /    | /    |
| ScO <sub>6</sub> @MoS <sub>2</sub> | 2.42 | 2.04 | 2.21 | /    |
| TiO <sub>6</sub> @MoS <sub>2</sub> | 2.43 | 2.06 | 2.09 | /    |
| VO <sub>6</sub> @MoS <sub>2</sub>  | 2.44 | 2.07 | 2.01 | /    |

|                                    |      |      |      |   |
|------------------------------------|------|------|------|---|
| CrO <sub>6</sub> @MoS <sub>2</sub> | 2.44 | 2.08 | 1.99 | / |
| MnO <sub>6</sub> @MoS <sub>2</sub> | 2.43 | 2.06 | 1.99 | / |
| FeO <sub>6</sub> @MoS <sub>2</sub> | 2.43 | 2.03 | 2.17 | / |
| CoO <sub>6</sub> @MoS <sub>2</sub> | 2.43 | 2.03 | 2.16 | / |
| NiO <sub>6</sub> @MoS <sub>2</sub> | 2.42 | 2.03 | 1.97 | / |
| CuO <sub>6</sub> @MoS <sub>2</sub> | 2.42 | 2.04 | 1.98 | / |
| ZnO <sub>6</sub> @MoS <sub>2</sub> | 2.42 | 2.08 | 1.95 | / |

**Table S26.** The adsorption energy of CO, OH and OH+H on 3d-TMO<sub>6</sub>@MoS<sub>2</sub>.

| Material systems                   | $\Delta E_{OH}$ | $\Delta E_{OH+H}$ | $\Delta E_{CO}$ |
|------------------------------------|-----------------|-------------------|-----------------|
| ScO <sub>6</sub> @MoS <sub>2</sub> | -2.36           | 0.64              | 0.30            |
| TiO <sub>6</sub> @MoS <sub>2</sub> | -1.89           | 2.11              | 0.30            |
| VO <sub>6</sub> @MoS <sub>2</sub>  | -0.80           | 1.30              | 0.30            |
| CrO <sub>6</sub> @MoS <sub>2</sub> | -1.32           | 1.65              | 0.30            |
| MnO <sub>6</sub> @MoS <sub>2</sub> | -2.21           | 0.92              | 0.30            |
| FeO <sub>6</sub> @MoS <sub>2</sub> | -2.40           | 0.49              | 0.29            |
| CoO <sub>6</sub> @MoS <sub>2</sub> | -2.03           | 0.84              | 0.29            |
| NiO <sub>6</sub> @MoS <sub>2</sub> | -1.28           | 0.96              | -0.01           |
| CuO <sub>6</sub> @MoS <sub>2</sub> | -1.42           | -0.49             | 0.28            |
| ZnO <sub>6</sub> @MoS <sub>2</sub> | -2.23           | -0.85             | 0.28            |

**Table S27.** Adsorption free energies of OH\*, O\*, OOH\* (eV) and theoretical overpotential for OER ( $\eta^{OER}$ , V vs RHE) on transition metal atom co-doped with six oxygen atoms in 2H phase MoS<sub>2</sub> with different defect structures (S-vacancy, Mo-vacancy, S-edge, Mo-edge). The catalytic performance better than or comparable to IrO<sub>2</sub> is marked with red.

| Material systems                             | $\Delta G_{OH}^*$ | $\Delta G_{O}^*$ | $\Delta G_{OOH}^*$ | $\eta^{OER}$ |
|----------------------------------------------|-------------------|------------------|--------------------|--------------|
| MoS <sub>2</sub>                             | 2.65              | 1.77             | 4.92               | 1.92         |
| S-vacancy@MoS <sub>2</sub>                   | -0.17             | -1.56            | 1.50               | 2.19         |
| S-edge@MoS <sub>2</sub>                      | 0.33              | 1.19             | 3.54               | 1.12         |
| Mo-vacancy @MoS <sub>2</sub>                 | 1.14              | 1.58             | 3.18               | 0.51         |
| Mo-edge @MoS <sub>2</sub>                    | -2.28             | -2.57            | -4.06              | 7.75         |
| CuO <sub>6</sub> -S-vacancy@MoS <sub>2</sub> | -1.96             | -1.82            | 0.84               | 2.85         |

|                                                |       |       |      |      |
|------------------------------------------------|-------|-------|------|------|
| CuO <sub>6</sub> -S-edge@MoS <sub>2</sub>      | -1.10 | -0.58 | 2.27 | 1.62 |
| CuO <sub>6</sub> -Mo-vacancy @MoS <sub>2</sub> | 0.47  | 1.61  | 3.98 | 1.14 |
| CuO <sub>6</sub> -Mo-edge @MoS <sub>2</sub>    | -2.09 | -2.15 | 1.21 | 2.48 |
| FeO <sub>6</sub> -S-vacancy@MoS <sub>2</sub>   | -2.03 | -2.01 | 0.87 | 2.82 |
| FeO <sub>6</sub> -S-edge@MoS <sub>2</sub>      | 0.68  | 1.56  | 3.94 | 1.16 |
| FeO <sub>6</sub> -Mo-vacancy @MoS <sub>2</sub> | 0.99  | 1.61  | 4.07 | 1.22 |
| FeO <sub>6</sub> -Mo-edge @MoS <sub>2</sub>    | -1.63 | -1.76 | 1.53 | 2.16 |

**Table S28.** OH\* adsorption free energies of tetra-coordinated structure (TMO<sub>3</sub>-OH) and hexa-coordinated structure (TMO<sub>6</sub>-OH) of TM (TM=Co and Fe) co-doped six oxygen atoms in 2H phase MoS<sub>2</sub> during OER reaction. The more thermodynamically stable coordination structure is marked with red.

| Material systems                   | $\Delta E(\text{TMO}_3\text{-OH})$ | $\Delta E(\text{TMO}_6\text{-OH})$ |
|------------------------------------|------------------------------------|------------------------------------|
| ScO <sub>6</sub> @MoS <sub>2</sub> | 1.19                               | 2.80                               |
| TiO <sub>6</sub> @MoS <sub>2</sub> | 1.67                               | 2.68                               |
| VO <sub>6</sub> @MoS <sub>2</sub>  | 2.76                               | 2.81                               |
| CrO <sub>6</sub> @MoS <sub>2</sub> | 2.24                               | 2.84                               |
| MnO <sub>6</sub> @MoS <sub>2</sub> | 1.34                               | 2.20                               |
| FeO <sub>6</sub> @MoS <sub>2</sub> | 1.16                               | 2.68                               |
| CoO <sub>6</sub> @MoS <sub>2</sub> | 1.53                               | 2.43                               |
| NiO <sub>6</sub> @MoS <sub>2</sub> | 1.83                               | 2.34                               |
| CuO <sub>6</sub> @MoS <sub>2</sub> | 2.14                               | 2.64                               |
| ZnO <sub>6</sub> @MoS <sub>2</sub> | 1.33                               | 2.45                               |

## References

1. Y. Zhou, J. Zhang, E. Song, J. Lin, J. Zhou, K. Suenaga, W. Zhou, Z. Liu, J. Liu, J. Lou and H. J. Fan, *Nat. Commun.*, 2020, **11**, 2253.
2. Y. Zhou, W. Hao, X. Zhao, J. Zhou, H. Yu, B. Lin, Z. Liu, S. J. Pennycook, S. Li and H. J. Fan, *Adv. Mater.*, 2021, 2100537.
3. Y. Wang, R. Zhang, X. Zhao, Y. Min and C. Liu, *ISIJ International*, 2020, **60**, 220-225.
4. D. Scarano, A. Zecchina, S. Bordiga, F. Geobaldo, G. Spoto, G. Petrini, G. Leofanti, M. Padovan and G. Tozzola, *Journal of the Chemical Society, Faraday Transactions*, 1993, **89**, 4123-4130.
5. K. Hedenstedt, J. Bäckström and E. Ahlberg, *J. Electrochem. Soc.*, 2017, **164**, H621-H627.
6. T. Baruah, R. R. Zope and M. R. Pederson, *Physical Review A*, 2004, **69**.
7. X. Pang, H. Bai, H. Zhao, W. Fan and W. Shi, *ACS Catalysis*, 2022, **12**, 1545-1557.
8. Y. Wang, W. M. Sun, X. F. Ling, X. K. Shi, L. L. Li, Y. D. Deng, C. H. An and X. P. Han, *Chem. - Eur. J.*, DOI: 10.1002/chem.201904238, 8.
9. Z. Y. Zhao, F. L. Li, Q. Shao, X. Q. Huang and J. P. Lang, *Adv. Mater. Interfaces*, 2019, **6**, 9.
10. B. S. Tang, Z. G. Yu, H. L. Seng, N. D. Zhang, X. X. Liu, Y. W. Zhang, W. F. Yang and H. Gong, *Nanoscale*, 2018, **10**, 20113-20119.
11. Q. Z. Xiong, Y. Wang, P. F. Liu, L. R. Zheng, G. Z. Wang, H. G. Yang, P. K. Wong, H. M. Zhang and H. J. Zhao, *Adv. Mater.*, 2018, **30**, 7.
12. Q. Xiong, X. Zhang, H. J. Wang, G. Q. Liu, G. Z. Wang, H. M. Zhang and H. J. Zhao, *Chem. Commun.*, 2018, **54**, 3859-3862.
13. H. Lee, J. Y. Kim, S. Lee, J. A. Hong, N. Kim, J. Baik and Y. J. Hwang, *Sci Rep*, 2018, **8**, 8.
14. R. P. Forslund, W. G. Hardin, X. Rong, A. M. Abakumov, D. Filimonov, C. T. Alexander, J. T. Mefford, H. Iyer, A. M. Kolpak, K. P. Johnston and K. J. Stevenson, *Nat. Commun.*, 2018, **9**, 11.
15. D. W. Wang, Q. Li, C. Han, Q. Q. Lu, Z. C. Xing and X. R. Yang, *Nat. Commun.*, 2019, **10**, 12.
16. K. Fan, H. Chen, Y. F. Ji, H. Huang, P. M. Claesson, Q. Daniel, B. Philippe, H. Rensmo, F. S. Li, Y. Luo and L. C. Sun, *Nat. Commun.*, 2016, **7**, 9.
17. Z. Y. Lu, L. Qian, Y. Tian, Y. P. Li, X. M. Sun and X. Duan, *Chem. Commun.*, 2016, **52**, 908-911.
18. J. Jiang, F. F. Sun, S. Zhou, W. Hu, H. Zhang, J. C. Dong, Z. Jiang, J. J. Zhao, J. F. Li, W. S. Yan and M. Wang, *Nat. Commun.*, 2018, **9**, 12.
19. S. Jaskaniec, C. Hobbs, A. Seral-Ascaso, J. Coelho, M. P. Browne, D. Tyndall, T. Sasaki and V. Nicolosi, *Sci Rep*, 2018, **8**, 8.
20. L. Zhou, C. Zhang, Y. Q. Zhang, Z. H. Li and M. F. Shao, *Adv. Funct. Mater.*, DOI: 10.1002/adfm.202009743, 9.
21. Y. Wang, W. M. Sun, X. F. Ling, X. K. Shi, L. L. Li, Y. D. Deng, C. H. An and X. P. Han, *Chem. - Eur. J.*, 2020, **26**, 4097-4103.
